# Supplementary material for: Barriers to, and facilitators in, introducing integrated diabetes care in Ireland: a qualitative study of views in general practice
Source: PubMed Central journal article supplement — BMJ Open. 2013 Aug 17;3(8):e003217. doi: 10.1136/bmjopen-2013-003217 (PMC3753479; doi:10.1136/bmjopen-2013-003217), 2013-08-17
Supplement: bmjopen-2013-003217.draft_revisions.pdf [file bmjopen-2013-003217.draft_revisions.pdf]

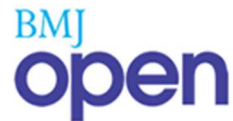

**Barriers and facilitators to introducing integrated diabetes care in Ireland: a qualitative study of views in general practice.**

|                                 |                                                                                                                                                                                                                                                                            |
|---------------------------------|----------------------------------------------------------------------------------------------------------------------------------------------------------------------------------------------------------------------------------------------------------------------------|
| Journal:                        | <i>BMJ Open</i>                                                                                                                                                                                                                                                            |
| Manuscript ID:                  | bmjopen-2013-003217                                                                                                                                                                                                                                                        |
| Article Type:                   | Research                                                                                                                                                                                                                                                                   |
| Date Submitted by the Author:   | 13-May-2013                                                                                                                                                                                                                                                                |
| Complete List of Authors:       | Mc Hugh, Sheena; University College Cork, Epidemiology & Public Health<br>O'Mullane, Monica; Trnava University, Public Health<br>Perry, Ivan; University College Cork, Epidemiology and Public Health<br>Bradley, Colin; University College Cork, Dept of General Practice |
| <b>Primary Subject Heading</b>: | Health services research                                                                                                                                                                                                                                                   |
| Secondary Subject Heading:      | Diabetes and endocrinology, General practice / Family practice, Health policy, Qualitative research                                                                                                                                                                        |
| Keywords:                       | Health policy < HEALTH SERVICES ADMINISTRATION & MANAGEMENT, Quality in health care < HEALTH SERVICES ADMINISTRATION & MANAGEMENT, PRIMARY CARE, DIABETES & ENDOCRINOLOGY                                                                                                  |
|                                 |                                                                                                                                                                                                                                                                            |

SCHOLARONE™  
Manuscripts

1  
2  
3 **Title:** Barriers and facilitators to introducing integrated diabetes care in Ireland: a qualitative  
4 study of views in general practice.  
5

6 **Authors:**  
7

8 S Mc Hugh, M O'Mullane, I J Perry, C Bradley  
9

10 Sheena Mc Hugh, Department of Epidemiology & Public Health, University College Cork,  
11 Ireland  
12

13 Monica O'Mullane, Department of Public Health, Faculty of Health Care and Social Work,  
14 Trnava University, Slovakia  
15

16  
17 Ivan J. Perry, Department of Epidemiology & Public Health, University College Cork,  
18 Ireland  
19

20 Colin Bradley, Department of General Practice, University College Cork, Ireland  
21

22 **Corresponding author:**  
23

24 Dr. Sheena Mc Hugh  
25

26 Department of Epidemiology & Public Health  
27

28 University College Cork  
29

30 Western Gateway Complex,  
31

32 Western Rd,  
33

34 Cork,  
35

36 Ireland.  
37

38 Tel: 00353 21 420 5526  
39

40 Fax: 00353 21 420 5469  
41

42 Email address: s.mchugh@ucc.ie  
43  
44  
45  
46

47 **Word count: 3922**  
48  
49  
50  
51  
52  
53  
54  
55  
56  
57  
58  
59  
60

## Article Summary

### Article Focus

1. Over the past two decades most health systems have reoriented Type 2 diabetes care from acute reactive services to regular integrated management in the primary care setting.
2. In Ireland, there are plans to reorganise and standardise diabetes care through the introduction of a national model of integrated care whereby the regular management of uncomplicated Type 2 diabetes would shift to primary care.
3. In advance of this reform, the aim of this study was to identify the current barriers and facilitators to integrated diabetes care from the general practice perspective.

### Key message

1. The main barriers to integrated diabetes care were at the level of the health system including a lack of remuneration for chronic disease management in general practice and difficulties coordinating care across the primary-secondary interface. These barriers had repercussions at an organisational, professional and patient level.
2. Efforts to improve the diabetes care relied on vocational incentives and luck.
3. There was strong opinion that policy proposals to shift routine management to primary care need to be supported by adequate resources and investment in community services.

### Strengths and limitations

- The use of qualitative methods allowed us to understand the views of the health care professionals expected to be part of the implementation and maintenance of integrated diabetes care on the ground.
- This study represents the views of those working in the general practice setting. It is equally important to understand the perspective of those in specialist secondary care services and to elicit patients' preferences regarding the organisation of diabetes care.

## ABSTRACT

**Objective:** To examine the current barriers and facilitators to improving diabetes management from the general practice perspective, in advance of the implementation of an integrated model of care in Ireland.

**Design:** Qualitative study using semi-structured interviews.

**Setting:** Primary care in the Republic of Ireland

**Participants:** A purposive sample of 29 General Practitioners (GPs) and 2 Practice Nurses (PNs) from practices across the Republic of Ireland.

**Methods:** Data were analysed using a Framework approach to identify themes.

**Results:** Barriers and facilitators occurred primarily at the level of the health system but had a ripple effect at an organisational, professional and patient level. The lack of targeted remuneration for diabetes management in the Irish health system created apathy among staff in general practice and was perceived to be indicative of the lack of value placed on chronic disease management in the health system. There were 'pockets of interest' among GPs motivated by 'vocational' incentives such as a sense of professional duty however, this was not sufficient to drive widespread improvement. The hospital service was seen as an essential support for primary care management, although some participants referred to emerging tension between settings. The lack of coordination at the primary-secondary interface resulted in avoidable duplication and uncertainty for patients and providers due to 'in the meantime care', the vague period of management between hospital reviews. Luck was one of determinants of a comprehensive diabetes service. The lack of resources in the community was perceived to be at odds with policy to shift routine management to general practice, a setting which is fast reaching saturation.

**Conclusions:** At present, intrinsic motivation is driving the improvement of diabetes care in Ireland. This will not be sufficient to implement the proposed reform including a national model of integrated care. Policy makers need to assess and prepare for the disparate levels of interest and infrastructure in primary care in Ireland to support this change.

## INTRODUCTION

In 1982, an article in the British Medical Journal suggested that the ‘care of [people with diabetes] requires enthusiasm and organisation’.<sup>1</sup> The authors endorsed general practice as the setting for the management of uncomplicated diabetes, working closely with hospital specialists. Most developed countries have since reoriented care from episodic management in the acute setting to regular structured management in the primary care setting, in recognition of the growing diabetes epidemic and the changing needs of patients.

The Chronic Care Model, which is frequently cited as a guiding framework for policy and reform in this area, proposes major changes to the organisation and delivery of care for people with chronic illnesses. This model highlights a number of essential components for high quality care including self management support, delivery system redesign, decision support and clinical information systems. Community resources, including links with other health care professionals, are also key component of effective care.<sup>2,3</sup> Diabetes is particularly challenging to coordinate given the myriad of health care providers and settings involved. National and international emphasis is now on integrated care which focuses on the organisation of management within settings and the coordination of care between settings.<sup>4,5,6</sup>

In Ireland, the introduction integrated diabetes care is one of the pillars of the National Clinical Care Programme for Diabetes, a programme established to improve the quality of care and patient outcomes. Under this model the routine management of uncomplicated Type 2 diabetes will shift to primary care while those with complicated Type 2 diabetes will be managed between primary and secondary care.<sup>5</sup> These changes are set against a backdrop of wider health system reform including the proposed introduction of free GP services for people with chronic conditions as part of a move towards a universal health insurance model. Currently in Ireland, some people are entitled to free GP care under the General Medical Scheme, based on means testing (37% of the population eligible in 2011).<sup>7</sup> Those who are not eligible must pay to attend the GP. In terms of diabetes care, at present there are a variety of care arrangements in place across the country including traditional hospital-based management, shared care between GPs and hospitals, primary care-led management<sup>8,9</sup> and unstructured opportunistic care. The most recent survey of diabetes management in general practice highlighted the lack of formal integration between settings.<sup>10</sup> Furthermore, there was a lack of structured management within the practice and insufficient access to services; over 30% of GPs did not have direct access to dietetic services while more than 40% did not have direct access to podiatry services.

Recent studies, which have examined the implementation of integrated chronic disease care in health systems such as the England and Denmark, have emphasised the importance of context.<sup>11,12</sup> The aim of this study was to examine the barriers and facilitators to delivering integrated diabetes care from the general practice perspective, in light of proposed reforms in the Irish health system. Health care professionals are key to the success or failure of improvement initiatives depending on their willingness to learn, accept and adapt to changes in practice<sup>13,14</sup> therefore, it is imperative to understand their perspectives prior to implementation.

## METHODS

This qualitative research was part of a wider study examining the organisation of diabetes care in Ireland, barriers and facilitators to optimal management and the attitudes quality improvement initiatives including the establishment of a national diabetes register. This paper focuses on themes which emerged in relation to the first and second research areas. Ethical approval was granted by the Irish College of General Practitioners.

### Participants and sampling

The study population consisted of General Practitioners working in the Republic of Ireland who had 'opted in' during a preceding postal survey on the organisation of diabetes care (N=213, 81% of survey respondents)<sup>10</sup>. In total, 25 out of 26 counties in the Republic of Ireland were represented in the study population.

Purposive sampling was used to capture the diversity of experiences in general practice. Participants were selected from practices which varied in size, urban/rural location and degree of practice computerisation, factors which could influence the organisation of care (Table 1). A total of 31 interviews were conducted with 29 General Practitioners (GPs) and 2 Practice Nurses (PN) nominated by the practices as the lead health care professional responsible for diabetes. Participants were initially contacted by letter and followed up by telephone contact during which the researchers explained the study aims and methodology. Each participant received an information sheet and outline of the topic guide in advance of the interview.

**Table 1 Participant Matrix (N=31)**

|                  | Urban (16) | Rural (15) |
|------------------|------------|------------|
| Single (15)      | 6          | 9          |
| Computerised     | 4          | 8          |
| Non-computerised | 2          | 1          |
| Group (16)       | 10         | 6          |
| Computerised     | 10         | 6          |
| Non-computerised | 0          | 0          |

### Interviews

Face-to-face interviews were conducted between July 2009 and January 2010, all of which took place in the participant's practice or home. Two researchers conducted the interviews (SMH=16, MOM=15 interviews) using the same semi-structured topic guide which was informed by the results of the aforementioned national survey and 2 pilot interviews. The topic guide was organised around five key issues; how diabetes care is currently delivered in the practice, challenges to managing diabetes effectively and efficiently, changes in care provision at local and national level, attitudes to the introduction of quality improvement strategies and participants' 'wish list' for diabetes care in Ireland. Prompts and probes were

1  
2  
3 used throughout the interviews to stimulate discussion. Signed informed consent was  
4 obtained before each interview which lasted 50 minutes on average. All but three of the  
5 interviews were digitally recorded and transcribed verbatim. Interviews, which were not  
6 recorded at the request of participants, were typed up from extensive field notes.  
7

## 8 9 **Analysis**

10  
11 Data were analysed iteratively, that is concurrently with data collection, to allow emerging  
12 themes to be explored in subsequent interviews<sup>15 16</sup>. Findings from of the initial interviews  
13 were discussed by the multidisciplinary research group which included expertise in health  
14 services research, social policy, epidemiology and public health and general practice (SMH,  
15 MOM, IP, CB). Discussions led to the reformulation of some of the prompts used during the  
16 interview. A checklist was originally devised to encourage the interviewee to indicate  
17 whether a factor was a barrier or facilitator to care delivery in his/her practice. However,  
18 experience during the interviews and initial analysis suggested that this format was restrictive  
19 and superficial as participants considered certain factors as both barriers and facilitators  
20 depending on their presence or absence in the practice. Hence, the checklist was modified  
21 into a written prompt, around which participants could discuss their views and experiences.  
22  
23

24  
25  
26 The Framework approach was used for data analysis.<sup>16</sup> This method enabled investigation of  
27 a priori objectives identified in the topic guide while also allowing new themes to emerge  
28 from the data. The systematic analytical process also provided transparency which facilitated  
29 analysis and discussion by multiple researchers.<sup>17</sup> Initially, interview transcripts were  
30 analysed independently by each researcher (SMH and MOM). The transcripts were read  
31 repeatedly (familiarization) and themes and concepts were identified. A thematic index or  
32 conceptual framework was developed from these codes based on the key areas of the topic  
33 guide but also including newly emerging themes. In this study, it was decided not to apply the  
34 index to the data as data were already quite orderly given the semi-structured nature of the  
35 interview schedule.<sup>16</sup> Data were sorted and synthesized by theme, bringing similar concepts  
36 together (thematic charting). Throughout the analysis the language and expressions of the  
37 GPs were maintained as far as possible to avoid losing the meaning and context.  
38  
39

40  
41  
42 Following separate first wave analysis, the researchers examined the convergence and  
43 divergence of their findings. Divergence arose from two conditions; 1) different labels or  
44 codes applied to the same concept or 2) unique concepts emerging from a researcher's  
45 analysis not identified by the other researcher. Overall, a similar 'constellation of themes'  
46 were identified and the difference lay in the labels applied to those themes, i.e. 'packaging' as  
47 described in another study employing multiple analysts.<sup>18</sup> Through discussion it became clear  
48 that divergent codes typically related to the same concept and consensus was reached on the  
49 most appropriate label to apply. Occasionally unique codes emerged from one researcher's  
50 analysis, which were discussed with the wider group. Three interviews from each researcher  
51 were subject to inter-coder reliability by an independent party not involved in data collection  
52 but familiar with the design and aims of the study (CB).  
53  
54  
55  
56  
57  
58  
59  
60

1  
2  
3 Memo writing was also as an analytic tool to identify avenues for analysis and interpretation  
4 to pursue, connections or comparisons between data and to uncover assumptions of both the  
5 participant and the researcher.<sup>19</sup> A summary of our interpretation was sent to each participant  
6 for respondent validity purposes. None of the participants requested changes to the  
7 interpretation of the data.  
8  
9

## 10 RESULTS

11  
12 Barriers and facilitators occurred at multiple levels within the health system and had knock-  
13 on effects as illustrated in Figure 1. The main barriers to optimal management occurred at the  
14 health system level: lack of remuneration for diabetes management, lack of coordination  
15 between settings and deficient access to services, particularly in the community. Facilitators  
16 included the availability of a Practice Nurse or Diabetes Nurse Specialist, and good luck.  
17  
18

### 19 Figure 1 Barriers & facilitators to delivering integrated diabetes care

#### 20 Financial Disincentives

21  
22 The lack of targeted remuneration or financial incentives to provide structured diabetes  
23 management in general practice emerged as one of the main barriers. The ‘non-existent’  
24 remuneration was a barrier to care delivery across single-physician and group practices, in  
25 both urban and rural areas. Current forms of remuneration left those practices that provided  
26 regular structured diabetes care at ‘a financial loss’. Practices are paid an annual capitation  
27 grant to cover the cost of providing free services to patients eligible under the General  
28 Medical Scheme. This funding is not linked to the intensity or quality of care provided which  
29 could act as ‘a disincentive’ to do more, according to some participants. Despite the flaws of  
30 the current system, there were divided opinions about the most form of remuneration.  
31 Participants expressed concern about performance-based remuneration and the potential to  
32 ‘corrupt’ the provision of care and its providers. One participant voiced the concern that  
33 ‘once you incentivise it [diabetes management] other things that you can’t incentivise get lost  
34 or diminished in the process.’  
35  
36

37  
38 According to participants the lack of remuneration led to barriers at other levels of the system  
39 including stunted practice development, imposing a cost barrier on patients without a medical  
40 card and creating a sense of apathy and ‘bad feeling’ among GPs (Box 1). Some participants  
41 related the lack of remuneration to the underlying differences in the priorities and values of  
42 health care professionals and management in the health system. There were frequent  
43 references to ‘us’ and ‘them’ in relation to policy makers and health service management.  
44 One participant suggested it was ‘typical of this health system that [the] things we value  
45 highly we don’t get paid for, so it’s really [down to] your own interest’. Others called for a  
46 new contract which recognised general practice as the most efficient and economical place  
47 for managing chronic conditions. However, the lack of resources in the community was seen  
48 as a barrier to shifting chronic disease management from the acute setting. Participants  
49 described how ‘they [policy makers] want us to do everything in the primary care setting  
50 which is understandable... as much as possible it would be nice to be supported to be able to  
51  
52  
53  
54  
55  
56  
57  
58  
59  
60



1  
2  
3 do that but it would mean more staff and that inevitably brings in things that would limit staff  
4 which would be incentives and remuneration’.  
5  
6

7 **Box 1: Consequences of the lack of remuneration**

8 **Cost implications for patients without a medical card**

9 “If we’re getting no recognition and no incentive and no remuneration or anything to do  
10 this work, I’d be mad in the head to... keep doing it unless I charge the patient and I don’t  
11 like doing that but I don’t have any choice” (GP101, rural single-handed practice)  
12

13 **Impeding practice development at an organisational level**

14 “At the moment care is opportunistic but if there were incentives for me to hold a clinic that would  
15 help. We could keep flow charts and I’d get remuneration because there is none and this [work]  
16 takes a lot of time, manpower, secretarial time, nurse time, and at the moment there’s no incentive  
17 to do that.” (GP5, urban group computerised practice)  
18

19 **Professional apathy**

20 “There’s no real recognition for it, which is important, because I think that if things do  
21 come down on us, things like [administering] the flu vaccine, which is a minor point, we’ll  
22 sort of say ‘fine’, but it’ll show apathy and then it’ll be ‘okay, we’ll see our diabetics once a  
23 year now’, because we have to end up making money elsewhere.” (GP112, rural group  
24 computerised practice)  
25  
26  
27

28 **Vocational Incentives**

29  
30 Participants made the distinction between the financial ‘disincentives’ around providing  
31 regular structured diabetes care and other ‘vocational’ or personal incentives (Box 2). Those  
32 who referred to vocational incentives had established a systematic structured approach to  
33 diabetes management, either as part of a local primary care initiative or independently within  
34 their own practice. However, participants acknowledged that a special interest in diabetes was  
35 limited to ‘pockets’ of practices and ‘you can’t expect all GPs to be desperately keen on it’.  
36 Beyond this group, remuneration and financial incentives would be the main facilitator to  
37 providing structured care in the practice and therefore the biggest barrier to engaging all GPs  
38 at present.  
39  
40  
41  
42  
43  
44  
45  
46  
47  
48  
49  
50  
51  
52  
53  
54  
55  
56  
57  
58  
59  
60

**Box 2. Vocational Incentives****Job Satisfaction**

“If we can get the older diabetics some better control, we'd be doing some good...so from a personal, job satisfaction professional point of view that would be a huge incentive for me” (GP110, rural group computerised practice)

**Patient Feedback**

“We're starting people on insulin who really need it and they feel so much better. [Patients say] 'my energy's back up'...so it's very rewarding, you get a lot of good feedback from patients” (GP103, urban group computerised practice)

**Personal Experience**

“My own father was in hospital 7 or 8 years ago. He was on the ward and there were 7 other guys, it was a vascular ward, and they were all diabetics. Some of them were in for 8, 12 weeks, or 16 weeks...incredible. At the same time I read somewhere that if you can get, is it, a 1% drop in the HbA1C, reduces the complications by 25%.So that struck a chord with me...” (GP110, rural group computer practice)

**Professional Duty**

“...the international evidence is such that we felt duty bound to offer as tight control as we can for patients” (GP103, urban group computerised practice)

**Personal Values & Priorities**

“Depending [on] what your attitude is and your enthusiasm [for] preventative stuff, which to me is just as important if not more important and it's enjoyable” (GP101, rural single computerised practice)

“We feel that we've improved the service that they've [patients] been given, so that was the incentive, but that's the only incentive” (GP112, rural, group computerised practice)

**Lack of Integration between settings and professionals**

The relationship between practices and secondary care diabetes teams was largely positive for most participants who described the hospital-based specialist service as ‘a resource’, ‘an essential support’ and a ‘door way to services’. A small number of participants reported an unconstructive relationship with the hospital-based team which was a barrier to delivering optimal care. These participants felt it would be hard to take part in integrated care ‘with the power struggle between primary care and secondary services’. Part of this struggle related to attempts on both sides of the primary-secondary interface to ‘hold on’ to patients.

According to participants, the primary barriers to integrated care did not occur at the professional level but at the level of the health system. The lack of coordination within the system had ramifications in both settings. Participants expressed uncertainty about the boundaries of responsibility and the need for ‘clear definition as to what the hospital is going to do, [and] what we're expected to do’. Most participants wanted joint involvement between consultants and GPs rather than an either/or situation which had negative implications for the patient and the professional according to one participant: ‘if you only deliver care in acute

1  
2  
3 services then people are left floundering for 6 or 9 months in between...but equally if you  
4 only see them in the community and they don't have a link with the hospital, when they run  
5 into a problem its sometimes very difficult to get somebody in quickly because they're not  
6 part of the system'  
7

8  
9 The lack of coordination and integrated management was reflected in the process of recalling  
10 patients for review. A participant from an urban group practice described how patients with  
11 diabetes were recalled 'by the system...as the hospital deems appropriate' with problems  
12 referred to the hospital in the meantime, 'that's as much of a protocol as there is'. Similarly,  
13 another participant from a rural group practice felt care was not really shared as the hospital  
14 brought back the patient until such time as they perceived no problem. The patient 'might'  
15 return to the GP but there was no sharing of information in the meantime. The phrase 'in the  
16 meantime' was used by several participants to describe the indefinite period of management  
17 between hospital reviews which caused frustration for professionals and patients.  
18 Furthermore, there was concern that some patients are 'falling through the net' and not  
19 attending either service.  
20  
21  
22

23  
24 The sub-theme 'in the meantime' care was one of a number which emerged during interviews  
25 as symptoms of the lack of co-ordination and organisation within the system (Box 3). Each  
26 symptom of poor coordination was a barrier in itself for patients and health care professionals  
27 trying to navigate the system. Participants called for the development of a shared protocol  
28 and shared information systems to improve the integration between settings. A shared  
29 protocol would address avoidable duplication and clarify the roles and responsibilities of each  
30 setting while a shared information system would minimize duplication and the current  
31 'palaver' surrounding processes of care in the system.  
32  
33  
34  
35  
36  
37  
38  
39  
40  
41  
42  
43  
44  
45  
46  
47  
48  
49  
50  
51  
52  
53  
54  
55  
56  
57  
58  
59  
60

### Box 3. Symptoms of the Lack of Coordination

#### 'In the meantime care'

"If you could say to [patients] 'look this is your diagnosis, this is what we're going to discuss and over the next 2 weeks you're going to meet A, B, C and then we have a baseline of everything covered from day 1 and you know exactly where you are, you're on a springboard ready to jump. As opposed to... saying 'stand on the spring board for about 2 months and then 2 months later you **might** get called for your eyes and 2 months later you **might** be called for your feet', in which time they may have had a problem with their feet and they're not quite sure how they should have dealt with it..." (Practice Nurse 104, rural group practice)

#### 'Overburdened' hospital clinics & waiting times

"I notice that they're pushing them [reviews] out further and further, the reviews would have been 6 months some time ago...its gone to 2 years...Consultants just don't have time, they can't see everybody. It's just not possible. They're doing their best. I've no complaints about their service at all." (GP113, urban single-handed practice)

"There's a massive diabetic clinic in the hospital but care is not better. It's difficult to make appointments, get access to services, especially when it's urgent." (GP10, urban single-handed practice)

#### The lack of boundaries and bureaucratic 'palaver' around processes of care

"At the moment it's a big palaver if you check cholesterol, get it to the patient to bring into the hospital and it gets lost in the process lots of times and then it seems incredibly wasteful of effort and time and resources." (GP106, urban group practice)

"...patients spend the last precious days of their lives going from out-patients to out-patients, confused as to who to believe, and in the ideal world, the GP service would be coordinating and making sure it doesn't happen too much,...then they get lost in the follow-up, it gets so complicated" (GP108, rural group practice)

#### 'Avoidable Duplication'

"Unfortunately they still have to be seen in the hospital annually because for things like retinopathy screening and podiatry care, there isn't one single unit where you could refer them...they have to go through the clinic, there's a bit of duplication that could be avoided" (Practice Nurse 104, rural group practice)

### Support Services- 'Not enough of them and too hard to access'

Participants described access to support services such as dietetics, podiatry and retinopathy screening as 'nonexistent' and 'abysmal' in some areas. The lack of services in the community and the resultant reliance on hospitals for the management of 'finer details like eyes and feet' was a barrier to community-based diabetes care. While the hospital was 'a doorway to services' for some, others described the secondary care services as a 'fortress' with lengthy waiting lists. Where services were in place in the community, availability was frequently described as 'patchy' in both urban and rural areas. Access to services such as dietetics and podiatry fell along a scale from good to bad, or bad to worst in some cases. Few

1  
2  
3 participants had access to a complete range of services for their patients. The availability of  
4 services was further jeopardised by the ongoing government policy to freeze recruitment in  
5 the public sector due to the economic recession. As a result maternity leave was not covered  
6 and those who retired were not replaced. One participant from an urban practice described  
7 how ‘foot care is not particularly good, it’s a bit random...Dieticians were good, we had a  
8 community dietician and then she went on maternity leave and she wasn’t replaced so now  
9 again it’s a bit patchy’. The most significant impact was on patients who were left ‘muddling  
10 through’. One participant described a patient ‘who had very poor eyesight due to diabetes and  
11 we couldn’t get a community podiatrist to see her...at all. I mean it [the waiting list] was  
12 about 2 years or something they told me...she wasn’t a priority’.

### 13 14 15 16 17 **‘Lucky’ to have access to specialists and support services**

18 Luck was a key factor in the availability of a comprehensive diabetes service. Several  
19 participants referred to themselves and their patients as ‘lucky’ to have access to services  
20 such as dieticians and podiatrists, recognising the unique position they were in. Participants  
21 also referred to the advantages of having a dedicate nurse within the practice or access to a  
22 diabetes nurse specialist. This facilitated the delivery of structured care within the practice  
23 and coordination between settings and specialists. Diabetes Nurse Specialists were described  
24 as ‘worth their weight in gold’ and ‘the single best thing to happen to diabetes from the  
25 management point of view’. Improvements in quality of patient care were attributed to  
26 enhanced nurse-led services in the practice and hospital setting.

### 27 28 29 30 31 **Risk of Saturation**

32 Time, resources and workload emerged as barriers to providing optimal diabetes care in  
33 general practice. However, participants did not dwell on these ‘limiting factors’ which were  
34 perceived as almost inevitable. Time ‘is always a barrier’ but *timing* was given more attention  
35 by participants who emphasized the importance of early intervention and regular review.  
36 Participants warned about the risk of ‘saturation’ in general practice as more and more  
37 services are moved to the community. The health system ‘needs to back up their policy of  
38 shifting [management] from secondary care to primary care’ by providing adequate  
39 resources.  
40  
41  
42  
43  
44  
45  
46  
47  
48  
49  
50  
51  
52  
53  
54  
55  
56  
57  
58  
59  
60

## DISCUSSION

Although desirable, the barriers to integrated care should not be underestimated<sup>20</sup>. The main barriers identified in this study were system-level deficiencies including the lack of remuneration for chronic disease management, poor coordination at the primary-secondary care interface and insufficient services, particularly in the community, which forced GPs to rely on the hospital as a doorway to other health care professionals. These challenges have a ripple effect throughout the system at an organisational, social, professional and patient level. Participants' accounts of providing 'in the meantime care' and the bureaucratic 'palaver' surrounding routine processes of care expose the lack of integration within the system currently, and the negative impact on efficiency, professional relationships, quality of care and patient experience.

The aim of this study was to identify and understand the barriers and facilitators to optimal diabetes care from the general practice perspective, in advance of the proposed reorganisation of services in Ireland. The national model of integrated care has yet to be implemented therefore the results of this study provide an opportunity to anticipate future barriers and plan solutions which take into account the local context of care provision. Research from the fields of implementation science and quality improvement has focused on ways to overcome structural and contextual barriers through tailored incremental change and professional leadership.<sup>11 21 22</sup> In this study participants proposed shared protocols and linked information systems as mechanisms to facilitate the provision of integrated care. While the National Clinical Care Programme for Diabetes has proposed care pathways for different patient groups, the absence of a single electronic medical record and unique patient identifier complicates efforts to share information and track patient care. Appropriate investment and infrastructure is needed to foster and support widespread participation in quality improvement.

The results support the contention that 'something more than personal financial gain is driving professional behaviour' (p5).<sup>23</sup> Vocational incentives were seen as the primary motivation for engaging in quality improvement in the absence of adequate financial remuneration. The distinction between types of incentive is congruent with existing theories of health worker motivation which identifies individual, organisational and cultural determinants<sup>24</sup>. Organisational determinants of motivation, such as communication processes and organisational support through adequate resources and efficient service delivery, are in short supply according to the participants in our study. Remuneration was considered necessary for widespread improvement as intrinsic incentives were limited to 'pockets of interest'. Policy-makers deciding on the ideal payment structure for chronic disease management should take into consideration the context<sup>25</sup> and the alignment of values between the professional and the organisation.<sup>23</sup> Participants commented that current systems of remuneration reflected discordance between the values of the health service management and health care professionals in terms of the importance of investing in chronic disease management and the contribution of primary care.

1  
2  
3 Some of the themes identified, such as the part played by luck in securing access to  
4 community services, are rooted in the context of the Irish health system. Despite the nuances  
5 of this system, similar barriers and facilitators have been identified in other countries.<sup>6 26-28</sup>  
6 While previous studies classified factors influencing diabetes care at the level of patient,  
7 provider and organisation/system, this study unpacked further layers of health care delivery,  
8 identifying barriers and facilitators relating to the relationships between providers,  
9 professional attitudes and the culture underlying the health system. A meta-synthesis of the  
10 barriers and facilitators to improvement should be conducted, to develop and understand the  
11 full extent of the evidence base.<sup>29</sup> A number of the barriers have implications beyond diabetes  
12 care and correspond to issues facing the wider primary care setting.<sup>30</sup> Consequently there is  
13 ample opportunity to learn from other settings and countries in terms of how to overcome  
14 these barriers.  
15  
16  
17  
18

19 The merits of involving more than one analyst in a qualitative study have been debated.<sup>31 32</sup> In  
20 addition to the predominance of research teams in health services research, analysts from  
21 different disciplines can bring breadth and depth to the findings.<sup>33 34</sup> Furthermore, this  
22 approach is often considered an implicit form of inter-rater reliability.<sup>18</sup> Inter-rater reliability  
23 was also applied explicitly in our study. The technique is considered appropriate in the  
24 context of semi-structured interviews whereby all participants are asked broadly the same  
25 questions in the same order.<sup>35</sup> Nevertheless, there is a risk of over-simplifying codes and  
26 themes to facilitate independent checking, therefore inter-rater reliability was used following  
27 the first wave of analysis on initial codes to minimise this risk.  
28  
29  
30

### 31 **Conclusions**

32  
33 The key ingredients of organisation and enthusiasm, highlighted in 1982, are reflected in the  
34 constellation of themes which emerged in this study of the barriers and facilitators to optimal  
35 integrated care. Given the proposals to reform diabetes services through the introduction of  
36 integrated care and the transfer of uncomplicated Type 2 diabetes management to primary  
37 care, there is a need to understand the current challenges to delivery in this setting.  
38 Reorientation of care must be accompanied by the reorganisation of support and resources.  
39 Internal incentives are drivers of change for pockets of health care professionals however this  
40 is not sufficient for widespread engagement of GPs in the delivery of a national model of  
41 integrated diabetes care.  
42  
43  
44  
45  
46  
47  
48  
49  
50  
51  
52  
53  
54  
55  
56  
57  
58  
59  
60

## Acknowledgement

We thank the doctors and nurses who participated in this study. This study was conducted on behalf of the National Diabetes Register Project (NDRP) group.

**Competing Interests:** None declared

**Funding:** This study was conducted on behalf of the National Diabetes Register Project (NDRP) group which was funded by the Health Research Board, Ireland. Sheena Mc Hugh was also funded by the Health Research Board (HRB) as a PhD Scholar of the Health Services Research Institute the HRB's Cross-Institution PhD Scholar Programme in Health Services Research.

## References

1. Thorn P, Watkins P. Organisation of Diabetic Care. *British Medical Journal* 1982;285(6344):787-89.
2. Wagner EH, Austin BT, Davis C, Hindmarsh M, Schaefer J, Bonomi A. Improving chronic illness care: translating evidence into action. *Health Affairs* 2001;20(6):64.
3. Bodenheimer T, Wagner EH, Grumbach K. Improving primary care for patients with chronic illness. *JAMA* 2002;288(14):1775-79.
4. Gröne O, Garcia-Barbero M. Integrated care: a position paper of the WHO European office for integrated health care services. *International Journal of Integrated Care* 2001;1.
5. Harkins V. A Practical Guide to Integrated Type 2 Diabetes Care. In: Irish College of General Practitioners, Health Service Executive, Irish Endocrine Society, editors. Dublin: Health Service Executive, 2008.
6. Johnson M, Goyder E. Changing roles, changing responsibilities and changing relationships: an exploration of the impact of a new model for delivering integrated diabetes care in general practice. *Quality in Primary Care* 2005;13(2):85-90.
7. Department of Health. Health in Ireland. Key Trends 2012. Dublin: Government of Ireland, 2012.
8. Brennan C, Harkins V, Perry I. Management of diabetes in primary care: A structured-care approach. *European Journal of General Practice* 2008;14(3):117-22.
9. Mc Hugh S, Marsden P, Brennan C, Murphy K, Croarkin C, Moran J, et al. Counting on commitment; the quality of primary care-led diabetes management in a system with minimal incentives. *BMC Health Serv Res* 2011;11(1):384-93.
10. Mc Hugh S, O'Keeffe J, Fitzpatrick A, de Siún A, O'Mullane M, Perry I, et al. Diabetes care in Ireland: A survey of general practitioners. *Primary Care Diabetes* 2009;3(4):225-31.
11. Vize R. Integrated care: a story of hard won success. *Bmj* 2012;344.
12. Rudkjøbing A, Olejaz M, Birk HO, Nielsen AJ, Hernández-Quevedo C, Krasnik A. Integrated care: a Danish perspective. *Bmj* 2012;345.
13. Berwick D, Enthoven A, Bunker J. Quality management in the NHS: the doctor's role--II. *BMJ: British Medical Journal* 1992;304(6822):304.
14. Scott T, Mannion R, Davies HTO, Marshall MN. Implementing culture change in health care: theory and practice. *Int J Qual Health Care* 2003;15(2):111-18.
15. Pope C, Ziebald S, Mays N. Analysing qualitative data. In: Pope C, Mays N, editors. *Qualitative research in health care*. 3rd ed. London: Blackwell Publishing, 2006.
16. Ritchie J, Lewis J. *Qualitative Research Practice: A Guide for Social Science Students & Researchers*. Thousand Oaks: Sage Publications, 2003.
17. Pope C, van Royen P, Baker R. Qualitative methods in research on healthcare quality. *Quality and Safety in Health Care* 2002;11(2):148-52.



18. Armstrong D, Gosling A, Weinman J, Marteau T. The place of inter-rater reliability in qualitative research: an empirical study. *Sociology* 1997;31(3):597.
19. Charmaz K. *Constructing Grounded Theory: A practical guide through qualitative analysis*. London: Sage Publications Ltd, 2006.
20. Godlee F. Integrated care is what we all want. *Bmj* 2012;344.
21. Berwick DM. Disseminating innovations in health care. *JAMA* 2003;289(15):1969-75.
22. Lemmens K, Nieboer A, Rutten-Van Mülken M, van Schayck C, Spreeuwenberg C, Asin J, et al. Bottom-up implementation of disease-management programmes: results of a multisite comparison. *BMJ Quality & Safety* 2011;20(1):76-86.
23. Marshall M, Harrison S. It's about more than money: financial incentives and internal motivation. *Quality and Safety in Health Care* 2005;14(1):4.
24. Franco LM, Bennett S, Kanfer R. Health sector reform and public sector health worker motivation: a conceptual framework. *Social Science & Medicine* 2002;54(8):1255-66.
25. Gosden T, Forland F, Kristiansen I, Sutton M, Leese B, Giuffrida A, et al. Capitation, salary, fee-for-service and mixed systems of payment: effects on the behaviour of primary care physicians. *Cochrane Database Syst Rev* 2000;3(3).
26. Agarwal G, Pierce M, Ridout D. The GP perspective: problems experienced in providing diabetes care in UK general practice. *Diabetic Medicine* 2002;19(s4):13-20.
27. Brown JB, Harris SB, Webster-Bogaert S, Wetmore S, Faulds C, Stewart M. The role of patient, physician and systemic factors in the management of type 2 diabetes mellitus. *Family Practice* 2002;19(4):344-49.
28. Khunti K, Ganguli S, Baker R, Lowy A. Features of primary care associated with variations in process and outcome of care of people with diabetes. *Br J Gen Pract* 2001;51(466):356-60.
29. Dixon-Woods M, Booth A, Sutton AJ. Synthesizing qualitative research: a review of published reports. *Qualitative Research* 2007;7(3):375-422.
30. Oelke ND, Thurston WE, Dipalma R, Tink W, Mazonde JN, Mak A, et al. Understanding issues in primary care: perspectives of primary care physicians. *Quality in Primary Care: Radcliffe Publishing*, 2006:253-58.
31. Malterud K. Qualitative research: standards, challenges, and guidelines. *The Lancet* 2001;358(9280):483-88.
32. Bradley E, Curry L, Devers K. Qualitative Data Analysis for Health Services Research: Developing Taxonomy, Themes, and Theory. *Health Services Research* 2007;42(4):1758.
33. Pope C, Mays N. Qualitative research: reaching the parts other methods cannot reach: an introduction to qualitative methods in health and health services research. 1995;311(6996):42-45.
34. Pope C, Ziebland S, Mays N. Qualitative research in health care: analysing qualitative data. *British Medical Journal* 2000;320(7227):114.
35. Morse J. " Perfectly Healthy, but Dead": The Myth of Inter-Rater Reliability. *Qualitative Health Research* 1997;7(4):445.

1  
2  
3  
4  
5  
6  
7  
8  
9  
10  
11  
12  
13  
14  
15  
16  
17  
18  
19  
20  
21  
22  
23  
24  
25  
26  
27  
28  
29  
30  
31  
32  
33  
34  
35  
36  
37  
38  
39  
40  
41  
42  
43  
44  
45  
46  
47  
48  
49

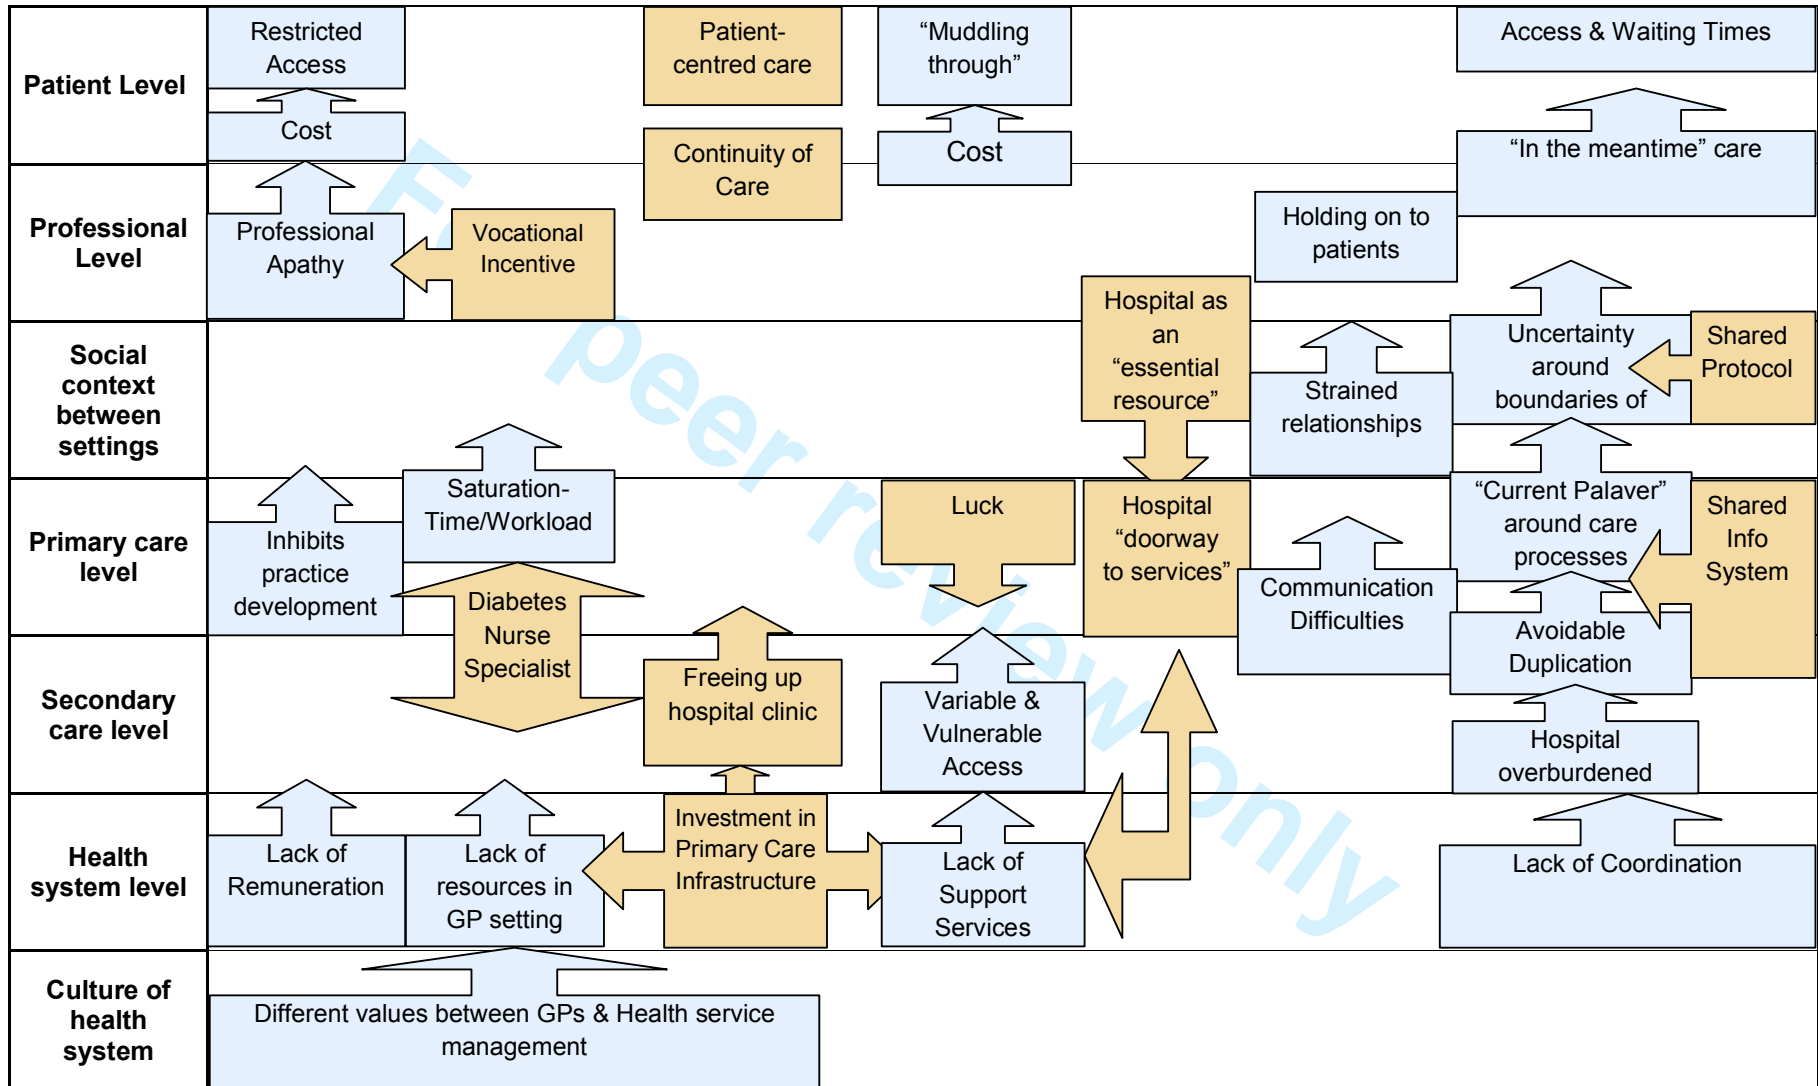

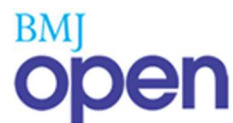

**Barriers and facilitators to introducing integrated diabetes care in Ireland: a qualitative study of views in general practice.**

|                                 |                                                                                                                                                                                                                                                                            |
|---------------------------------|----------------------------------------------------------------------------------------------------------------------------------------------------------------------------------------------------------------------------------------------------------------------------|
| Journal:                        | <i>BMJ Open</i>                                                                                                                                                                                                                                                            |
| Manuscript ID:                  | bmjopen-2013-003217.R1                                                                                                                                                                                                                                                     |
| Article Type:                   | Research                                                                                                                                                                                                                                                                   |
| Date Submitted by the Author:   | 28-Jun-2013                                                                                                                                                                                                                                                                |
| Complete List of Authors:       | Mc Hugh, Sheena; University College Cork, Epidemiology & Public Health<br>O'Mullane, Monica; Trnava University, Public Health<br>Perry, Ivan; University College Cork, Epidemiology and Public Health<br>Bradley, Colin; University College Cork, Dept of General Practice |
| <b>Primary Subject Heading</b>: | Health services research                                                                                                                                                                                                                                                   |
| Secondary Subject Heading:      | Diabetes and endocrinology, General practice / Family practice, Health policy, Qualitative research                                                                                                                                                                        |
| Keywords:                       | Health policy < HEALTH SERVICES ADMINISTRATION & MANAGEMENT, Quality in health care < HEALTH SERVICES ADMINISTRATION & MANAGEMENT, PRIMARY CARE, DIABETES & ENDOCRINOLOGY                                                                                                  |
|                                 |                                                                                                                                                                                                                                                                            |

SCHOLARONE™  
Manuscripts

1  
2  
3 **Title:** Barriers and facilitators to introducing integrated diabetes care in Ireland: a qualitative  
4 study of views in general practice.  
5

6 **Authors:**  
7

8 S Mc Hugh, M O'Mullane, I J Perry, C Bradley  
9

10 Sheena Mc Hugh, Department of Epidemiology & Public Health, University College Cork,  
11 Ireland  
12

13 Monica O'Mullane, Department of Public Health, Faculty of Health Care and Social Work,  
14 Trnava University, Slovakia  
15

16 Ivan J. Perry, Department of Epidemiology & Public Health, University College Cork,  
17 Ireland  
18

19 Colin Bradley, Department of General Practice, University College Cork, Ireland  
20

21 **Corresponding author:**  
22

23 Dr. Sheena Mc Hugh  
24

25 Department of Epidemiology & Public Health  
26

27 University College Cork  
28

29 Western Gateway Complex,  
30

31 Western Rd,  
32

33 Cork,  
34

35 Ireland.  
36

37 Tel: 00353 21 420 5526  
38

39 Fax: 00353 21 420 5469  
40

41 Email address: s.mchugh@ucc.ie  
42  
43  
44  
45

46  
47 **Word count: 4613**  
48  
49  
50  
51  
52  
53  
54  
55  
56  
57  
58  
59  
60

## Article Summary

### Article Focus

1. Over the past two decades most health systems have reoriented Type 2 diabetes care from acute reactive services to regular integrated management in the primary care setting.
2. In Ireland, there are plans to reorganise and standardise diabetes care through the introduction of a national model of integrated care whereby the regular management of uncomplicated Type 2 diabetes would shift to primary care.
3. In advance of this reform, the aim of this study was to identify the current barriers and facilitators to integrated diabetes care from the general practice perspective.

### Key message

1. The main barriers to integrated diabetes care were at the level of the health system including a lack of remuneration for chronic disease management in general practice and difficulties coordinating care across the primary-secondary interface. These barriers had repercussions at an organisational, professional and patient level.
2. Efforts to improve the diabetes care relied on vocational incentives and serendipitous access to services.
3. There was strong opinion that policy proposals to shift routine management to primary care need to be supported by adequate resources and investment in community services.

### Strengths and limitations

- The use of qualitative methods allowed us to understand the views of the health care professionals expected to be part of the implementation and maintenance of integrated diabetes care on the ground.
- This study represents the views of those working in the general practice setting. It is equally important to understand the perspective of those in specialist secondary care services and to elicit patients' preferences regarding the organisation of diabetes care.

## ABSTRACT

**Objective:** To examine the barriers and facilitators to improving diabetes management from the general practice perspective, in advance of the implementation of an integrated model of care in Ireland.

**Design:** Qualitative using semi-structured interviews.

**Setting:** Primary care in the Republic of Ireland

**Participants:** Purposive sample of 29 General Practitioners (GPs) and 2 Practice Nurses (PNs).

**Methods:** Data were analysed using a framework approach.

**Results:** The main barriers and facilitators occurred at the level of the health system but had a ripple effect at an organisational, professional and patient level. The lack of targeted remuneration for diabetes management in the Irish health system created apathy in general practice and was perceived to be indicative of the lack of value placed on chronic disease management in the health system. There were 'pockets of interest' among GPs motivated by 'vocational' incentives such as a sense of professional duty however, this was not sufficient to drive widespread improvement. The hospital service was seen as an essential support for primary care management, although some participants referred to emerging tension between settings. The lack of coordination at the primary-secondary interface resulted in avoidable duplication and an 'in the meantime' period of uncertainty around when patients would be called or recalled by specialist services. Facilitators included the availability of nursing support and serendipitous access to services. The lack of resources in the community was considered at odds with policy to shift routine management to general practice, which is fast reaching saturation.

**Conclusions:** At present, intrinsic motivation is driving the improvement of diabetes care in Ireland. This will not be sufficient to implement the proposed reform including a national model of integrated care. Policy makers need to assess and prepare for the disparate levels of interest and infrastructure in primary care in Ireland to support this change.

## INTRODUCTION

In 1982, an article in the British Medical Journal suggested that the ‘care of [people with diabetes] requires enthusiasm and organisation’.<sup>1</sup> The authors endorsed general practice as the setting for the management of uncomplicated diabetes, working closely with hospital specialists. Most developed countries have since reoriented care from episodic management in the acute setting to regular structured management in the primary care setting, in recognition of the growing diabetes epidemic and the changing needs of patients.

The Chronic Care Model, which is frequently cited as a guiding framework for policy and reform in this area, proposes major changes to the organisation and delivery of care for people with chronic illnesses. This model highlights a number of essential components for high quality care including self management support, delivery system redesign, decision support and clinical information systems. Community resources, including links with other health care professionals, are another component of effective care.<sup>2,3</sup> Diabetes is particularly challenging to coordinate given the myriad of health care providers and settings involved. National and international emphasis is now on integrated care which focuses on the organisation of management within settings and the coordination of care between settings.<sup>4,5,6</sup>

In Ireland, the introduction of integrated diabetes care is one of the pillars of the National Clinical Care Programme for Diabetes, a programme established to improve the quality of care and patient outcomes. Under this model the routine management of uncomplicated Type 2 diabetes will shift to primary care while those with complicated Type 2 diabetes will be managed between primary and secondary care.<sup>5</sup> These changes are set against a backdrop of wider health system reform including the proposed introduction of free GP services for people with chronic conditions as part of a move towards a universal health insurance model. Currently in Ireland, some people are entitled to free acute GP care under the General Medical Scheme, based on means testing (37% of the population eligible in 2011).<sup>7</sup> Those who are not eligible must pay to attend the GP. In terms of diabetes care, at present there are a variety of care arrangements in place across the country including traditional hospital-based management, shared care between GPs and hospitals, primary care-led management<sup>8,9</sup> and unstructured opportunistic care. The most recent survey of diabetes management in general practice highlighted the lack of formal integration between settings.<sup>10</sup> Furthermore, there was a lack of structured management within the practice and insufficient access to services; over 30% of GPs did not have direct access to dietetic services while more than 40% did not have direct access to podiatry services.

Recent studies, which have examined the implementation of integrated chronic disease care in countries such as the England and Denmark, have emphasised the importance of context.<sup>11</sup>  
<sup>12</sup> The aim of this study was to examine the barriers and facilitators to delivering integrated diabetes care from the general practice perspective, in light of proposed reforms in the Irish health system. Health care professionals are key to the success or failure of improvement initiatives depending on their willingness to learn, accept and adapt to changes in practice<sup>13</sup>  
<sup>14</sup> therefore, it is imperative to understand their perspectives prior to implementation.

## METHODS

This qualitative research was part of a wider study examining the organisation of diabetes care in Ireland, barriers and facilitators to optimal management and attitudes to quality improvement initiatives including the establishment of a national diabetes register. This paper focuses on themes which emerged in relation to the first and second research areas. Ethical approval was granted by the Irish College of General Practitioners.

### Participants and sampling

The study population consisted of General Practitioners working in the Republic of Ireland who had 'opted in' during a preceding postal survey on the organisation of diabetes care. There was a 44% response rate to the initial survey (n=262) and the majority of participants indicated willingness to be contacted for a follow-up interview (n=213, 81% of survey respondents)<sup>10</sup>. In total, 25 out of 26 counties in the Republic of Ireland were represented in the study population and the profile of the survey respondents was broadly comparable with the national GP profile in terms of urban/rural breakdown and proportion of single-handed/group practices<sup>15</sup>. Approximately half of the original survey respondents self-reported a special interest in diabetes, and most practices had a computer system (93%) in line with the national profile of general practice<sup>15</sup>.

Purposive sampling was used to capture the diversity of experiences in general practice. Participants were selected from practices which varied in size, urban/rural location and degree of practice computerisation, factors which could influence the organisation of care (Table 1). A total of 31 interviews were conducted with 29 General Practitioners (GPs) and 2 Practice Nurses (PN) nominated by the practices as the lead health care professional responsible for diabetes. Participants were initially contacted by letter and followed up by telephone contact during which the researchers explained the study aims and methodology. Each participant received an information sheet and outline of the topic guide in advance of the interview.

**Table 1 Participant Matrix (N=31)**

|                  | Urban (16) | Rural (15) |
|------------------|------------|------------|
| Single (15)      | 6          | 9          |
| Computerised     | 4          | 8          |
| Non-computerised | 2          | 1          |
| Group (16)       | 10         | 6          |
| Computerised     | 10         | 6          |
| Non-computerised | 0          | 0          |

### Interviews

Face-to-face interviews were conducted between July 2009 and January 2010, all of which took place in the participant's practice or home. Two researchers conducted the interviews



1  
2  
3 (SMH=16, MOM=15 interviews) using the same semi-structured topic guide which was  
4 informed by the results of the aforementioned national survey and 2 pilot interviews. The  
5 topic guide was organised around five key issues; how diabetes care is currently delivered in  
6 the practice, challenges to managing diabetes effectively and efficiently, changes in care  
7 provision at local and national level, attitudes to the introduction of quality improvement  
8 strategies and participants' 'wish list' for diabetes care in Ireland. Prompts and probes were  
9 used throughout the interviews to stimulate discussion. Signed informed consent was  
10 obtained before each interview which lasted 50 minutes on average. All but three of the  
11 interviews were digitally recorded and transcribed verbatim. Interviews, which were not  
12 recorded at the request of participants, were typed up from extensive field notes.

## 16 Analysis

18 Data were analysed iteratively, that is concurrently with data collection, to allow emerging  
19 themes to be explored in subsequent interviews<sup>16 17</sup>. Findings from the initial interviews were  
20 discussed by the multidisciplinary research group which included expertise in health services  
21 research, social policy, epidemiology and public health and general practice (SMH, MOM,  
22 IP, CB). Discussions led to the reformulation of some of the prompts used during the  
23 interview. A checklist was originally devised to encourage the interviewee to indicate  
24 whether a factor was a barrier or facilitator to care delivery in his/her practice. However,  
25 experience during the interviews and initial analysis suggested that this format was restrictive  
26 and superficial as participants considered certain factors as both barriers and facilitators  
27 depending on their presence or absence in the practice. Hence, the checklist was modified  
28 into a written prompt, around which participants could discuss their views and experiences.

30 The framework approach was used for data analysis.<sup>17</sup> This method enabled investigation of a  
31 priori objectives identified in the topic guide while also allowing new themes to emerge from  
32 the data. The systematic analytical process also provided transparency which facilitated  
33 analysis and discussion by multiple researchers.<sup>18</sup> Initially, interview transcripts were  
34 analysed independently by each researcher (SMH and MOM). The transcripts were read  
35 repeatedly (familiarization) and themes and concepts were identified. A thematic index or  
36 conceptual framework was developed from these codes based on the key areas of the topic  
37 guide but also including newly emerging themes. In this study, it was decided not to apply the  
38 index to the data as data were already quite orderly given the semi-structured nature of the  
39 interview schedule.<sup>17</sup> Data were sorted and synthesized by theme, bringing similar concepts  
40 together (thematic charting). Throughout the analysis the language and expressions of the  
41 GPs were maintained as far as possible to avoid losing the meaning and context.

43 Following separate first wave analysis, the researchers examined the convergence and  
44 divergence of their findings. Divergence arose from two conditions; 1) different labels or  
45 codes applied to the same concept or 2) unique concepts emerging from a researcher's  
46 analysis not identified by the other researcher. Overall, a similar 'constellation of themes'  
47 were identified and the difference lay in the labels applied to those themes, i.e. 'packaging' as  
48 described in another study employing multiple analysts.<sup>19</sup> Through discussion it became clear  
49 that divergent codes typically related to the same concept and consensus was reached on the

1  
2  
3 most appropriate label to apply. Occasionally unique codes emerged from one researcher's  
4 analysis, which were discussed with the wider group. Three interviews from each researcher  
5 were subject to inter-coder reliability by an independent party not involved in data collection  
6 but familiar with the design and aims of the study (CB).  
7

8  
9 Memo writing was also used as an analytic tool to identify avenues for analysis and  
10 interpretation to pursue, connections or comparisons between data and to uncover  
11 assumptions of both the participant and the researcher.<sup>20</sup> A summary of our interpretation was  
12 sent to each participant for respondent validity purposes. None of the participants requested  
13 changes to the interpretation of the data.  
14

## 15 16 **RESULTS**

17  
18 Participants' in this study represented the diversity of diabetes care arrangements in Ireland.  
19 There was variation in the level of organisation around diabetes care within practices from  
20 'ad-hoc' opportunistic management to structured diabetes care characterised by regular recall  
21 and review, patient registration and nurse coordination. Although most participants were  
22 from computerised practices, the extent to which they utilised electronic records varied.  
23 There were also different experiences of sharing care with hospital specialists. Hence,  
24 barriers and facilitators were rooted in the context of care delivery; a particular support or  
25 resource could be a barrier or facilitator depending on its presence or absence in a  
26 participant's practice.  
27  
28  
29

30  
31 Barriers and facilitators occurred at multiple levels within the health system and had knock-  
32 on effects. The main barriers to optimal management occurred at the health system level: lack  
33 of remuneration for diabetes management, lack of coordination between settings and deficient  
34 access to services, particularly in the community. Facilitators included the availability of a  
35 Practice Nurse or Diabetes Nurse Specialist, and serendipitous access to services which  
36 participants felt was due to good 'luck' rather than a process of service planning in the health  
37 system. Figure 1 illustrates these barriers and facilitators and where they occur within the  
38 health system. The figure was developed based on analysis of the transcripts. The  
39 connections identified within the diagram are based on the ramification of various barriers as  
40 identified by participants themselves during the interview process.  
41  
42  
43

### 44 **Figure 1 Barriers & facilitators to delivering integrated diabetes care**

#### 45 46 **Financial Disincentives**

47  
48 The lack of targeted remuneration or financial incentives to provide structured diabetes  
49 management in general practice emerged as one of the main barriers. The 'non-existent'  
50 remuneration was a barrier to care delivery across single-physician and group practices, in  
51 both urban and rural areas. Current forms of remuneration left those practices that provided  
52 regular structured diabetes care at 'a financial loss'. Practices are paid an annual capitation  
53 grant to cover the cost of providing acute services to patients eligible under the General  
54 Medical Scheme. This funding is not linked to the intensity or quality of care provided which  
55 could act as 'a disincentive' to do more, according to some participants. Despite the flaws of  
56  
57  
58  
59  
60

1  
2  
3 the current system, there were divided opinions about the most appropriate form of  
4 remuneration. Participants expressed concern about performance-based remuneration and the  
5 potential to ‘corrupt’ the provision of care and its providers. One participant voiced the  
6 concern that ‘once you incentivise it [diabetes management] other things that you can’t  
7 incentivise get lost or diminished in the process.’  
8  
9

10 The lack of remuneration led to barriers at other levels of the system including stunted  
11 practice development, imposing a cost barrier on patients without a medical card and creating  
12 a sense of apathy and ‘bad feeling’ among GPs (Box 1). Some participants related the lack of  
13 remuneration to the underlying differences in the priorities and values of health care  
14 professionals and management in the health system. There were frequent references to ‘us’  
15 and ‘them’ in relation to policy makers and health service management. One participant  
16 suggested it was ‘typical of this health system that [the] things we value highly we don’t get  
17 paid for, so it’s really [down to] your own interest’. Others called for a new contract which  
18 recognised general practice as the most efficient and economical place for managing chronic  
19 conditions. However, the lack of resources in the community was seen as a barrier to shifting  
20 chronic disease management from the acute setting. Participants described how ‘they [policy  
21 makers] want us to do everything in the primary care setting which is understandable... as  
22 much as possible it would be nice to be supported to be able to do that but it would mean  
23 more staff and that inevitably brings in things that would limit staff which would be  
24 incentives and remuneration’.  
25  
26  
27  
28  
29

30  
31 **Box 1: Consequences of the lack of remuneration**

32 **Cost implications for patients without a medical card**

33 “If we’re getting no recognition and no incentive and no remuneration or anything to do  
34 this work, I’d be mad in the head to... keep doing it unless I charge the patient and I don’t  
35 like doing that but I don’t have any choice” (GP101, rural single-handed practice)  
36

37 **Impeding practice development at an organisational level**

38 “At the moment care is opportunistic but if there were incentives for me to hold a clinic that would  
39 help. We could keep flow charts and I’d get remuneration because there is none and this [work]  
40 takes a lot of time, manpower, secretarial time, nurse time, and at the moment there’s no incentive  
41 to do that.” (GP5, urban group computerised practice)  
42

43 **Professional apathy**

44 “There’s no real recognition for it, which is important, because I think that if things do  
45 come down on us, things like [administering] the flu vaccine, which is a minor point, we’ll  
46 sort of say ‘fine’, but it’ll show apathy and then it’ll be ‘okay, we’ll see our diabetics once a  
47 year now’, because we have to end up making money elsewhere.” (GP112, rural group  
48 computerised practice)  
49  
50

51  
52 **‘Vocational’ Incentives**

53  
54 Participants made the distinction between the financial and ‘vocational’ incentives for  
55 providing regular structured diabetes care. ‘Vocational’ incentives related to a sense of  
56 personal or professional obligation to improve care delivery, which acted as internal  
57  
58  
59  
60

motivation for some participants (Box 2). Those who referred to vocational incentives as a source of motivation had established a systematic structured approach to diabetes management, either as part of a local primary care initiative or independently within their own practice. However, participants acknowledged that a special interest in diabetes was limited to ‘pockets’ of practices and ‘you can’t expect all GPs to be desperately keen on it’. Beyond this group, remuneration and financial incentives would be the main facilitator to providing structured care in the practice and therefore the biggest barrier to engaging all GPs at present.

## **Box 2. Vocational Incentives**

### **Job Satisfaction**

“If we can get the older diabetics some better control, we'd be doing some good...so from a personal, job satisfaction professional point of view that would be a huge incentive for me” (GP110, rural group computerised practice)

### **Patient Feedback**

“We're starting people on insulin who really need it and they feel so much better. [Patients say] 'my energy's back up'...so it's very rewarding, you get a lot of good feedback from patients” (GP103, urban group computerised practice)

### **Personal Experience**

“My own father was in hospital 7 or 8 years ago. He was on the ward and there were 7 other guys, it was a vascular ward, and they were all diabetics. Some of them were in for 8, 12 weeks, or 16 weeks...incredible. At the same time I read somewhere that if you can get, is it, a 1% drop in the HbA1C, reduces the complications by 25%.So that struck a chord with me...” (GP110, rural group computer practice)

### **Professional Duty**

“...the international evidence is such that we felt duty bound to offer as tight control as we can for patients” (GP103, urban group computerised practice)

### **Personal Values & Priorities**

“Depending [on] what your attitude is and your enthusiasm [for] preventative stuff, which to me is just as important if not more important and it's enjoyable” (GP101, rural single computerised practice)

“We feel that we've improved the service that they've [patients] been given, so that was the incentive, but that's the only incentive” (GP112, rural, group computerised practice)

## **Lack of Integration between settings and professionals**

The relationship between practices and secondary care diabetes teams was largely positive for most participants who described the hospital-based specialist service as ‘a resource’, ‘an essential support’ and a ‘door way to services’. A small number of participants reported an unconstructive relationship with the hospital-based team which was a barrier to delivering optimal care. These participants felt it would be hard to take part in integrated care ‘with the

1  
2  
3 power struggle between primary care and secondary services'. Part of this struggle related to  
4 attempts on both sides of the primary-secondary interface to 'hold on' to patients.  
5

6  
7 According to participants, the primary barriers to integrated care did not occur at the  
8 professional level but at the level of the health system. The lack of coordination within the  
9 system manifested itself in a number of ways and had ramifications in both settings (Box 3).  
10 In the first instance, participants expressed uncertainty about the boundaries of responsibility  
11 and highlighted the need for 'clear definition as to what the hospital is going to do, [and]  
12 what we're expected to do'. Most participants wanted joint involvement between consultants  
13 and GPs rather than an either/or situation which had negative implications for the patient and  
14 the professional according to one participant: 'if you only deliver care in acute services then  
15 people are left floundering for 6 or 9 months in between...but equally if you only see them in  
16 the community and they don't have a link with the hospital, when they run into a problem its  
17 sometimes very difficult to get somebody in quickly because they're not part of the system'  
18  
19

20  
21 In addition, the lack of coordination and integrated management led to a sense of ambiguity  
22 around the patients' care pathway. A number of participants referred to an 'in the meantime'  
23 period; this referred to uncertainty about when patients would be called or recalled by  
24 specialist services. For example, one participant from an urban single-handed computerised  
25 practice 'supposed' 'that we're to pick them [patients] up in the meantime', that is between  
26 hospital reviews, but 'there's been no communication, there's been no meetings, there's been  
27 no working group... it's just sort of left like that'. Another participant from an urban group  
28 practice described how patients with diabetes were recalled 'by the system...as the hospital  
29 deems appropriate' with problems referred to the hospital in the meantime, 'that's as much of  
30 a protocol as there is'. This sense of uncertainty around the care pathway also emerged in  
31 relation to accessing support services (illustrated by the quote in Box 3) and was seen as  
32 particularly difficult for patients who were newly diagnosed with diabetes. Furthermore, there  
33 was concern that some patients are 'falling through the net' and not attending either service.  
34  
35  
36  
37

38  
39 Participants called for the development of a shared protocol to reduce avoidable duplication  
40 and clarify the roles and responsibilities within each setting. Those from computerised  
41 practices emphasised the need for shared information systems to minimize duplication and  
42 overcome the current 'palaver' surrounding processes of care, such as routine blood tests, in  
43 the system. Participants from non-computerised practices did not view non-computerisation  
44 as a barrier to integrated care or optimal diabetes management.  
45  
46

47 'It's what works for me. I'm updated in terms of training and meetings and all that  
48 kind of thing...But I would like to see us having a place in anything that would  
49 develop [in terms of the implementation of integrated diabetes care]' (GP115, rural  
50 single-handed non-computerised).  
51  
52  
53  
54  
55  
56  
57  
58  
59  
60

### Box 3. Symptoms of the Lack of Coordination

#### Uncertainty of ‘in the meantime care’ for patients and providers

“If you could say to [patients] ‘look this is your diagnosis, this is what we’re going to discuss and over the next 2 weeks you’re going to meet A, B, C and then we have a baseline of everything covered from day 1 and you know exactly where you are, you’re on a springboard ready to jump. As opposed to... saying ‘stand on the spring board for about 2 months and then 2 months later you **might** get called for your eyes and 2 months later you **might** be called for your feet’, in which time they may have had a problem with their feet and they’re not quite sure how they should have dealt with it...” (Practice Nurse 104, rural group practice)

#### ‘Overburdened’ hospital clinics & waiting times

“I notice that they’re pushing them [reviews] out further and further, the reviews would have been 6 months some time ago...its gone to 2 years...Consultants just don’t have time, they can’t see everybody. It’s just not possible. They’re doing their best. I’ve no complaints about their service at all.” (GP113, urban single-handed practice)

“There’s a massive diabetic clinic in the hospital but care is not better. It’s difficult to make appointments, get access to services, especially when it’s urgent.” (GP10, urban single-handed practice)

#### The lack of boundaries and bureaucratic ‘palaver’ around processes of care

“At the moment it’s a big palaver if you check cholesterol, get it to the patient to bring into the hospital and it gets lost in the process lots of times and then it seems incredibly wasteful of effort and time and resources.” (GP106, urban group practice)

“...patients spend the last precious days of their lives going from out-patients to out-patients, confused as to who to believe, and in the ideal world, the GP service would be coordinating and making sure it doesn’t happen too much,...then they get lost in the follow-up, it gets so complicated” (GP108, rural group practice)

#### ‘Avoidable Duplication’

“Unfortunately they still have to be seen in the hospital annually because for things like retinopathy screening and podiatry care, there isn’t one single unit where you could refer them...they have to go through the clinic, there’s a bit of duplication that could be avoided” (Practice Nurse 104, rural group practice)

### Support Services- ‘Not enough of them and too hard to access’

Participants described access to support services such as dietetics, podiatry and retinopathy screening as ‘nonexistent’ and ‘abysmal’ in some areas. The lack of services in the community and the resultant reliance on hospitals for the management of ‘finer details like eyes and feet’ was a barrier to community-based diabetes care. While the hospital was ‘a doorway to services’ for some, others described the secondary care services as a ‘fortress’ with lengthy waiting lists. Where services were in place in the community, availability was frequently described as ‘patchy’ in both urban and rural areas. Access to services such as dietetics and podiatry fell along a scale from good to bad, or bad to worst in some cases. Few

1  
2  
3 participants had access to a complete range of services for their patients. The availability of  
4 services was further jeopardised by the ongoing government policy to freeze recruitment in  
5 the public sector due to the economic recession. As a result maternity leave was not covered  
6 and those who retired were not replaced. One participant from an urban practice described  
7 how ‘foot care is not particularly good, it’s a bit random...Dieticians were good, we had a  
8 community dietician and then she went on maternity leave and she wasn’t replaced so now  
9 again it’s a bit patchy’. The most significant impact was on patients who were left ‘muddling  
10 through’. One participant described a patient ‘who had very poor eyesight due to diabetes and  
11 we couldn’t get a community podiatrist to see her...at all. I mean it [the waiting list] was  
12 about 2 years or something they told me...she wasn’t a priority’.

### 16 **‘Lucky’ to have access to specialists and support services**

18 Several participants referred to themselves and their patients as ‘lucky’ to have access to  
19 services such as dieticians and podiatrists, suggesting that these services evolved by chance  
20 rather than systematic service planning within the health system. Participants acknowledged  
21 the unique position they were in given the aforementioned ‘patchy’ access to services. Access  
22 in some cases resulted from the resourcefulness of health care professionals in establishing  
23 partnerships or optimising opportunities.

27 ‘We’re very lucky here, in that we’ve had a very good access to a dietician for the last  
28 few years now. It was just something they tried themselves. They were based in the  
29 city, and they decided to put some outreach clinics out in the county, and they picked  
30 this town for one of their centres.’

33 Participants also referred to luck in relation to the availability of a dedicate nurse within the  
34 practice or access to a diabetes nurse specialist. This facilitated the delivery of structured care  
35 within the practice and coordination between settings and specialists. Diabetes Nurse  
36 Specialists were described as ‘worth their weight in gold’ and ‘the single best thing to happen  
37 to diabetes from the management point of view’. Improvements in quality of patient care  
38 were attributed to enhanced nurse-led services in the practice and hospital setting.

### 41 **Risk of General Practice becoming saturated**

43 Time, resources and workload emerged as barriers to providing optimal diabetes care in  
44 general practice. However, participants did not dwell on these ‘limiting factors’ which were  
45 perceived as almost inevitable. Time ‘is always a barrier’ but *timing* was given more attention  
46 by participants who emphasized the importance of early intervention and regular review.  
47 Participants warned about the risk of general practice becoming saturated as more services  
48 are moved to the community including other chronic physical and mental illnesses and the  
49 “huge amount of bloods being done” in primary care. The health system ‘needs to back up  
50 their policy of shifting [management] from secondary care to primary care’ by providing  
51 adequate resources.  
52  
53  
54  
55  
56  
57  
58  
59  
60

1  
2  
3 “We always have been willing to take on more and more stuff that is primary care-  
4 based [and] bring it out of secondary care but we’re saturated now” (GP110, rural  
5 group computerised)  
6  
7  
8  
9

## 10 11 12 **DISCUSSION**

13  
14 Although desirable, the barriers to integrated care should not be underestimated.<sup>21</sup> The main  
15 barriers identified in this study were system-level deficiencies including the lack of  
16 remuneration for chronic disease management, poor coordination at the primary-secondary  
17 care interface and insufficient services, particularly in the community, which forced GPs to  
18 rely on the hospital as a doorway to other health care professionals. These challenges have a  
19 ripple effect throughout the system at an organisational, social, professional and patient level.  
20 Participants’ accounts of providing ‘in the meantime care’ and the bureaucratic ‘palaver’  
21 surrounding routine processes of care expose the lack of integration within the system  
22 currently, and the negative impact on efficiency, professional relationships, quality of care  
23 and patient experience.  
24  
25  
26

27  
28 The aim of this study was to identify and understand the barriers and facilitators to optimal  
29 diabetes care from the general practice perspective, in advance of the proposed reorganisation  
30 of services in Ireland. The national model of integrated care has yet to be implemented  
31 therefore the results of this study provide an opportunity to anticipate future barriers and plan  
32 solutions which take into account the local context of care provision. Research from the fields  
33 of implementation science and quality improvement has focused on ways to overcome  
34 structural and contextual barriers through tailored incremental change and professional  
35 leadership.<sup>11 22 23</sup> In this study participants proposed shared protocols and linked information  
36 systems as mechanisms to facilitate the provision of integrated care. While the National  
37 Clinical Care Programme for Diabetes has proposed care pathways for different patient  
38 groups, the absence of a single electronic medical record and unique patient identifier  
39 complicates efforts to share information and track patient care. Appropriate investment and  
40 infrastructure is needed to foster and support widespread participation in quality  
41 improvement.  
42  
43  
44  
45

46  
47 The results support the contention that ‘something more than personal financial gain is  
48 driving professional behaviour’ (p5).<sup>24</sup> Vocational incentives were seen as the primary  
49 motivation for engaging in quality improvement in the absence of adequate financial  
50 remuneration. The distinction between types of incentive is congruent with existing theories  
51 of health worker motivation which identifies individual, organisational and cultural  
52 determinants<sup>25</sup>. Organisational determinants of motivation, such as communication processes  
53 and organisational support through adequate resources and efficient service delivery, are in  
54 short supply according to the participants in our study. Remuneration was considered  
55 necessary for widespread improvement as intrinsic incentives were limited to ‘pockets of  
56 interest’. Policy-makers deciding on the ideal payment structure for chronic disease  
57  
58  
59  
60



1  
2  
3 management should take into consideration the context<sup>26</sup> and the alignment of values  
4 between the professional and the organisation.<sup>24</sup> Participants commented that current systems  
5 of remuneration reflected discordance between the values of the health service management  
6 and health care professionals in terms of the importance of investing in chronic disease  
7 management and the contribution of primary care.  
8  
9

10 Some of the themes identified, such as the part played by local circumstances and 'luck' in  
11 securing access to community services, are rooted in the context of the Irish health system  
12 and the history of underinvestment in primary care in Ireland. Despite the nuances of this  
13 system, similar barriers and facilitators have been identified in other countries.<sup>6 27-29</sup> While  
14 previous studies classified factors influencing diabetes care at the level of patient, provider  
15 and organisation/system, this study unpacked further layers of health care delivery,  
16 identifying barriers and facilitators relating to the relationships between providers,  
17 professional attitudes and the culture underlying the health system. A meta-synthesis of the  
18 barriers and facilitators to improvement should be conducted, to develop and understand the  
19 full extent of the evidence base.<sup>30</sup> A number of the barriers have implications beyond diabetes  
20 care and correspond to issues facing the wider primary care setting.<sup>31</sup> Consequently there is  
21 ample opportunity to learn from other settings and countries in terms of how to overcome  
22 these barriers.  
23  
24  
25  
26

### 27 **Limitations**

28  
29 Participation in this study was based on an 'opt in' procedure during a preceding survey of  
30 GPs in Ireland.<sup>10</sup> This could influence the profile of those who volunteered to be interviewed  
31 however this is a consideration for all qualitative studies. Due to the anonymous nature of the  
32 survey it was not possible to link practice and professional demographics to those who  
33 agreed/did not agree to be interviewed. The survey sample was in line with the national  
34 profile of general practice in Ireland in terms of practice size, location and level of  
35 computerisation.<sup>15</sup> Participants' experiences typified the diversity of care arrangements in the  
36 Irish health system and the organisation of diabetes care in practice ranged from ad-hoc to  
37 structured management. While practice characteristics guided the sampling strategy,  
38 perceptions of the main barriers were largely consistent across the sub-groups and attitudes  
39 were shaped to a greater extent by the context of care in terms of access to various supports  
40 and services. The merits of involving more than one analyst in a qualitative study have been  
41 debated.<sup>32 33</sup> In addition to the predominance of research teams in health services research,  
42 analysts from different disciplines can bring breadth and depth to the findings.<sup>34 35</sup>  
43 Furthermore, this approach is often considered an implicit form of inter-rater reliability.<sup>19</sup>  
44 Inter-rater reliability was also applied explicitly in our study. The technique is considered  
45 appropriate in the context of semi-structured interviews whereby all participants are asked  
46 broadly the same questions in the same order.<sup>36</sup> Nevertheless, there is a risk of over-  
47 simplifying codes and themes to facilitate independent checking, therefore inter-rater  
48 reliability was used following the first wave of analysis on initial codes to minimise this risk.  
49  
50  
51  
52  
53  
54

55  
56 This study presents the barriers and facilitators to optimal diabetes management from the  
57 general practice perspective. The other health care professionals involved in the delivery of  
58  
59  
60

1  
2  
3 diabetes care may face unique challenges within their setting or profession. Furthermore,  
4 while participants highlighted barriers within the system for patients such as the out-of-  
5 pocket costs associated GP care in Ireland, further research with patients is warranted to  
6 garner their views on the introduction of integrated diabetes care in Ireland. A similar  
7 qualitative study has been conducted on patients' attitudes to shared care arrangements in  
8 Ireland.<sup>37</sup>  
9  
10

## 11 **Conclusions**

12  
13 The key ingredients of organisation and enthusiasm, highlighted in 1982<sup>1</sup>, are reflected in the  
14 constellation of themes which emerged in this study of the barriers and facilitators to optimal  
15 integrated care. Given the proposals to reform diabetes services through the introduction of  
16 integrated care and the transfer of uncomplicated Type 2 diabetes management to primary  
17 care, there is a need to understand the current challenges to delivery in this setting.  
18 Reorientation of care must be accompanied by the reorganisation of support and resources.  
19 Vocational incentives are motivating factors for 'pockets' of health care professionals  
20 however, this is not sufficient for widespread engagement of GPs in the delivery of a national  
21 model of integrated diabetes care.  
22  
23  
24  
25  
26  
27  
28  
29  
30  
31  
32  
33  
34  
35  
36  
37  
38  
39  
40  
41  
42  
43  
44  
45  
46  
47  
48  
49  
50  
51  
52  
53  
54  
55  
56  
57  
58  
59  
60

## Acknowledgement

We thank the doctors and nurses who participated in this study. This study was conducted on behalf of the National Diabetes Register Project (NDRP) group.

**Competing Interests:** None declared

**Funding:** This study was conducted on behalf of the National Diabetes Register Project (NDRP) group which was funded by the Health Research Board, Ireland. Sheena Mc Hugh was also funded by the Health Research Board (HRB) as a PhD Scholar of the Health Services Research Institute the HRB's Cross-Institution PhD Scholar Programme in Health Services Research.

## References

1. Thorn P, Watkins P. Organisation of Diabetic Care. *British Medical Journal* 1982;285(6344):787-89.
2. Wagner EH, Austin BT, Davis C, Hindmarsh M, Schaefer J, Bonomi A. Improving chronic illness care: translating evidence into action. *Health Affairs* 2001;20(6):64.
3. Bodenheimer T, Wagner EH, Grumbach K. Improving primary care for patients with chronic illness. *JAMA* 2002;288(14):1775-79.
4. Gröne O, Garcia-Barbero M. Integrated care: a position paper of the WHO European office for integrated health care services. *International Journal of Integrated Care* 2001;1.
5. Harkins V. A Practical Guide to Integrated Type 2 Diabetes Care. In: Irish College of General Practitioners, Health Service Executive, Irish Endocrine Society, editors. Dublin: Health Service Executive, 2008.
6. Johnson M, Goyder E. Changing roles, changing responsibilities and changing relationships: an exploration of the impact of a new model for delivering integrated diabetes care in general practice. *Quality in Primary Care* 2005;13(2):85-90.
7. Department of Health. Health in Ireland. Key Trends 2012. Dublin: Government of Ireland, 2012.
8. Brennan C, Harkins V, Perry I. Management of diabetes in primary care: A structured-care approach. *European Journal of General Practice* 2008;14(3):117-22.
9. Mc Hugh S, Marsden P, Brennan C, Murphy K, Croarkin C, Moran J, et al. Counting on commitment; the quality of primary care-led diabetes management in a system with minimal incentives. *BMC Health Serv Res* 2011;11(1):384-93.
10. Mc Hugh S, O'Keeffe J, Fitzpatrick A, de Siún A, O'Mullane M, Perry I, et al. Diabetes care in Ireland: A survey of general practitioners. *Primary Care Diabetes* 2009;3(4):225-31.
11. Vize R. Integrated care: a story of hard won success. *Bmj* 2012;344.
12. Rudkjøbing A, Olejaz M, Birk HO, Nielsen AJ, Hernández-Quevedo C, Krasnik A. Integrated care: a Danish perspective. *Bmj* 2012;345.
13. Berwick D, Enthoven A, Bunker J. Quality management in the NHS: the doctor's role--II. *BMJ: British Medical Journal* 1992;304(6822):304.
14. Scott T, Mannion R, Davies HTO, Marshall MN. Implementing culture change in health care: theory and practice. *Int J Qual Health Care* 2003;15(2):111-18.
15. O'Dowd T, O'Kelly M, O'Kelly F, Trinity College. Dept. of Public Health & Primary Care. *Structure of general practice in Ireland: 1982-2005*. Dublin: Department of Public Health and Primary Care, Trinity College Centre for Health Sciences [and] Irish College of General Practitioners, 2006.
16. Pope C, Ziebald S, Mays N. Analysing qualitative data. In: Pope C, Mays N, editors. *Qualitative research in health care*. 3rd ed. London: Blackwell Publishing, 2006.

17. Ritchie J, Lewis J. *Qualitative Research Practice: A Guide for Social Science Students & Researchers*. Thousand Oaks: Sage Publications, 2003.
18. Pope C, van Royen P, Baker R. Qualitative methods in research on healthcare quality. *Quality and Safety in Health Care* 2002;11(2):148-52.
19. Armstrong D, Gosling A, Weinman J, Marteau T. The place of inter-rater reliability in qualitative research: an empirical study. *Sociology* 1997;31(3):597.
20. Charmaz K. *Constructing Grounded Theory: A practical guide through qualitative analysis*. London: Sage Publications Ltd, 2006.
21. Godlee F. Integrated care is what we all want. *Bmj* 2012;344.
22. Berwick DM. Disseminating innovations in health care. *JAMA* 2003;289(15):1969-75.
23. Lemmens K, Nieboer A, Rutten-Van Mólken M, van Schayck C, Spreeuwenberg C, Asin J, et al. Bottom-up implementation of disease-management programmes: results of a multisite comparison. *BMJ Quality & Safety* 2011;20(1):76-86.
24. Marshall M, Harrison S. It's about more than money: financial incentives and internal motivation. *Quality and Safety in Health Care* 2005;14(1):4.
25. Franco LM, Bennett S, Kanfer R. Health sector reform and public sector health worker motivation: a conceptual framework. *Social Science & Medicine* 2002;54(8):1255-66.
26. Gosden T, Forland F, Kristiansen I, Sutton M, Leese B, Giuffrida A, et al. Capitation, salary, fee-for-service and mixed systems of payment: effects on the behaviour of primary care physicians. *Cochrane Database Syst Rev* 2000;3(3).
27. Agarwal G, Pierce M, Ridout D. The GP perspective: problems experienced in providing diabetes care in UK general practice. *Diabetic Medicine* 2002;19(s4):13-20.
28. Brown JB, Harris SB, Webster-Bogaert S, Wetmore S, Faulds C, Stewart M. The role of patient, physician and systemic factors in the management of type 2 diabetes mellitus. *Family Practice* 2002;19(4):344-49.
29. Khunti K, Ganguli S, Baker R, Lowy A. Features of primary care associated with variations in process and outcome of care of people with diabetes. *Br J Gen Pract* 2001;51(466):356-60.
30. Dixon-Woods M, Booth A, Sutton AJ. Synthesizing qualitative research: a review of published reports. *Qualitative Research* 2007;7(3):375-422.
31. Oelke ND, Thurston WE, Dipalma R, Tink W, Mazonde JN, Mak A, et al. Understanding issues in primary care: perspectives of primary care physicians. *Quality in Primary Care: Radcliffe Publishing*, 2006:253-58.
32. Malterud K. Qualitative research: standards, challenges, and guidelines. *The Lancet* 2001;358(9280):483-88.
33. Bradley E, Curry L, Devers K. Qualitative Data Analysis for Health Services Research: Developing Taxonomy, Themes, and Theory. *Health Services Research* 2007;42(4):1758.
34. Pope C, Mays N. Qualitative research: reaching the parts other methods cannot reach: an introduction to qualitative methods in health and health services research. 1995;311(6996):42-45.
35. Pope C, Ziebland S, Mays N. Qualitative research in health care: analysing qualitative data. *British Medical Journal* 2000;320(7227):114.
36. Morse J. " Perfectly Healthy, but Dead": The Myth of Inter-Rater Reliability. *Qualitative Health Research* 1997;7(4):445.
37. Smith SM, O'Leary M, Bury G, Shannon W, Tynan A, Staines A, et al. A qualitative investigation of the views and health beliefs of patients with Type 2 diabetes following the introduction of a diabetes shared care service. *Diabetic Medicine* 2003;20(10):853-57.

#### Legend Figure 1:

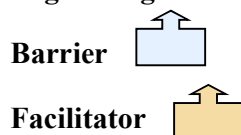



1  
2  
3  
4  
5  
6  
7 **Title:** Barriers and facilitators to introducing integrated diabetes care in Ireland: a qualitative  
8 study of views in general practice.

9  
10 **Authors:**

11 S Mc Hugh, M O'Mullane, I J Perry, C Bradley

12  
13 Sheena Mc Hugh, Department of Epidemiology & Public Health, University College Cork,  
14 Ireland

15  
16 Monica O'Mullane, Department of Public Health, Faculty of Health Care and Social Work,  
17 Trnava University, Slovakia

18  
19 Ivan J. Perry, Department of Epidemiology & Public Health, University College Cork,  
20 Ireland

21  
22 Colin Bradley, Department of General Practice, University College Cork, Ireland

23  
24 **Corresponding author:**

25 Dr. Sheena Mc Hugh

26  
27 Department of Epidemiology & Public Health

28  
29 University College Cork

30  
31 Western Gateway Complex,

32  
33 Western Rd,

34  
35 Cork,

36  
37 Ireland.

38  
39 Tel: 00353 21 420 5526

40  
41 Fax: 00353 21 420 5469

42  
43 Email address: s.mchugh@ucc.ie

44  
45 **Word count: 4613**  
46  
47  
48  
49  
50  
51  
52  
53  
54  
55  
56  
57  
58  
59  
60

## Article Summary

### Article Focus

1. Over the past two decades most health systems have reoriented Type 2 diabetes care from acute reactive services to regular integrated management in the primary care setting.
2. In Ireland, there are plans to reorganise and standardise diabetes care through the introduction of a national model of integrated care whereby the regular management of uncomplicated Type 2 diabetes would shift to primary care.
3. In advance of this reform, the aim of this study was to identify the current barriers and facilitators to integrated diabetes care from the general practice perspective.

### Key message

1. The main barriers to integrated diabetes care were at the level of the health system including a lack of remuneration for chronic disease management in general practice and difficulties coordinating care across the primary-secondary interface. These barriers had repercussions at an organisational, professional and patient level.
2. Efforts to improve the diabetes care relied on vocational incentives and serendipitous access to services.
3. There was strong opinion that policy proposals to shift routine management to primary care need to be supported by adequate resources and investment in community services.

### Strengths and limitations

- The use of qualitative methods allowed us to understand the views of the health care professionals expected to be part of the implementation and maintenance of integrated diabetes care on the ground.
- This study represents the views of those working in the general practice setting. It is equally important to understand the perspective of those in specialist secondary care services and to elicit patients' preferences regarding the organisation of diabetes care.

**ABSTRACT**

**Objective:** To examine the ~~current~~ barriers and facilitators to improving diabetes management from the general practice perspective, in advance of the implementation of an integrated model of care in Ireland.

**Design:** Qualitative ~~study~~ using semi-structured interviews.

**Setting:** Primary care in the Republic of Ireland

**Participants:** ~~A p~~Purposive sample of 29 General Practitioners (GPs) and 2 Practice Nurses (PNs) ~~from practices across the Republic of Ireland.~~

**Methods:** Data were analysed using a framework approach ~~to identify themes.~~

**Results:** ~~The main B~~barriers and facilitators occurred ~~primarily~~ at the level of the health system but had a ripple effect at an organisational, professional and patient level. The lack of targeted remuneration for diabetes management in the Irish health system created apathy ~~among staff~~ in general practice and was perceived to be indicative of the lack of value placed on chronic disease management in the health system. There were 'pockets of interest' among GPs motivated by 'vocational' incentives such as a sense of professional duty however, this was not sufficient to drive widespread improvement. The hospital service was seen as an essential support for primary care management, although some participants referred to emerging tension between settings. The lack of coordination at the primary-secondary interface resulted in avoidable duplication and an 'in the meantime' period of uncertainty around when patients would be called or recalled by specialist services~~uncertainty for patients and providers due to 'in the meantime care', the vague period of management between hospital reviews.~~ Facilitators included the availability of nursing support and serendipitous access to services.~~Lack was one of determinants of a comprehensive diabetes service.~~ The lack of resources in the community was perceived to be considered at odds with policy to shift routine management to general practice, ~~a setting~~ which is fast reaching saturation.

**Conclusions:** At present, intrinsic motivation is driving the improvement of diabetes care in Ireland. This will not be sufficient to implement the proposed reform including a national model of integrated care. Policy makers need to assess and prepare for the disparate levels of interest and infrastructure in primary care in Ireland to support this change.



## INTRODUCTION

In 1982, an article in the British Medical Journal suggested that the 'care of [people with diabetes] requires enthusiasm and organisation'.<sup>1</sup> The authors endorsed general practice as the setting for the management of uncomplicated diabetes, working closely with hospital specialists. Most developed countries have since reoriented care from episodic management in the acute setting to regular structured management in the primary care setting, in recognition of the growing diabetes epidemic and the changing needs of patients.

The Chronic Care Model, which is frequently cited as a guiding framework for policy and reform in this area, proposes major changes to the organisation and delivery of care for people with chronic illnesses. This model highlights a number of essential components for high quality care including self management support, delivery system redesign, decision support and clinical information systems. Community resources, including links with other health care professionals, are ~~also key~~ another component of effective care.<sup>2 3</sup> Diabetes is particularly challenging to coordinate given the myriad of health care providers and settings involved. National and international emphasis is now on integrated care which focuses on the organisation of management within settings and the coordination of care between settings.<sup>4 5 6</sup>

In Ireland, the introduction of integrated diabetes care is one of the pillars of the National Clinical Care Programme for Diabetes, a programme established to improve the quality of care and patient outcomes. Under this model the routine management of uncomplicated Type 2 diabetes will shift to primary care while those with complicated Type 2 diabetes will be managed between primary and secondary care.<sup>5</sup> These changes are set against a backdrop of wider health system reform including the proposed introduction of free GP services for people with chronic conditions as part of a move towards a universal health insurance model. Currently in Ireland, some people are entitled to free acute GP care under the General Medical Scheme, based on means testing (37% of the population eligible in 2011).<sup>7</sup> Those who are not eligible must pay to attend the GP. In terms of diabetes care, at present there are a variety of care arrangements in place across the country including traditional hospital-based management, shared care between GPs and hospitals, primary care-led management<sup>8 9</sup> and unstructured opportunistic care. The most recent survey of diabetes management in general practice highlighted the lack of formal integration between settings.<sup>10</sup> Furthermore, there was a lack of structured management within the practice and insufficient access to services; over 30% of GPs did not have direct access to dietetic services while more than 40% did not have direct access to podiatry services.

Recent studies, which have examined the implementation of integrated chronic disease care in ~~health systems~~ countries such as the England and Denmark, have emphasised the importance of context.<sup>11 12</sup> The aim of this study was to examine the barriers and facilitators to delivering integrated diabetes care from the general practice perspective, in light of proposed reforms in the Irish health system. Health care professionals are key to the success or failure of improvement initiatives depending on their willingness to learn, accept and adapt to changes in practice<sup>13 14</sup> therefore, it is imperative to understand their perspectives prior to implementation.

## METHODS

This qualitative research was part of a wider study examining the organisation of diabetes care in Ireland, barriers and facilitators to optimal management and ~~the~~ attitudes to quality improvement initiatives including the establishment of a national diabetes register. This paper focuses on themes which emerged in relation to the first and second research areas. Ethical approval was granted by the Irish College of General Practitioners.

### Participants and sampling

The study population consisted of General Practitioners working in the Republic of Ireland who had 'opted in' during a preceding postal survey on the organisation of diabetes care. There was a 44% response rate to the initial survey (n=262) and the majority of participants indicated willingness to be contacted for a follow-up interview (N=213, 81% of survey respondents)<sup>10</sup>. In total, 25 out of 26 counties in the Republic of Ireland were represented in the study population and the profile of the survey respondents was broadly comparable with the national GP profile in terms of urban/rural breakdown and proportion of single-handed/group practices<sup>15</sup>. Approximately half of the original survey respondents self-reported a special interest in diabetes, and most practices had a computer system (93%) in line with the national profile of general practice<sup>15</sup>.

Purposive sampling was used to capture the diversity of experiences in general practice. Participants were selected from practices which varied in size, urban/rural location and degree of practice computerisation, factors which could influence the organisation of care (Table 1). A total of 31 interviews were conducted with 29 General Practitioners (GPs) and 2 Practice Nurses (PN) nominated by the practices as the lead health care professional responsible for diabetes. Participants were initially contacted by letter and followed up by telephone contact during which the researchers explained the study aims and methodology. Each participant received an information sheet and outline of the topic guide in advance of the interview.

**Table 1 Participant Matrix (N=31)**

|                  | Urban (16) | Rural (15) |
|------------------|------------|------------|
| Single (15)      | 6          | 9          |
| Computerised     | 4          | 8          |
| Non-computerised | 2          | 1          |
| Group (16)       | 10         | 6          |
| Computerised     | 10         | 6          |
| Non-computerised | 0          | 0          |

### Interviews

Face-to-face interviews were conducted between July 2009 and January 2010, all of which took place in the participant's practice or home. Two researchers conducted the interviews

1  
2  
3  
4  
5  
6  
7 (SMH=16, MOM=15 interviews) using the same semi-structured topic guide which was  
8 informed by the results of the aforementioned national survey and 2 pilot interviews. The  
9 topic guide was organised around five key issues; how diabetes care is currently delivered in  
10 the practice, challenges to managing diabetes effectively and efficiently, changes in care  
11 provision at local and national level, attitudes to the introduction of quality improvement  
12 strategies and participants' 'wish list' for diabetes care in Ireland. Prompts and probes were  
13 used throughout the interviews to stimulate discussion. Signed informed consent was  
14 obtained before each interview which lasted 50 minutes on average. All but three of the  
15 interviews were digitally recorded and transcribed verbatim. Interviews, which were not  
16 recorded at the request of participants, were typed up from extensive field notes.

### 18 Analysis

19  
20 Data were analysed iteratively, that is concurrently with data collection, to allow emerging  
21 themes to be explored in subsequent interviews<sup>16 17</sup>. Findings from the initial interviews were  
22 discussed by the multidisciplinary research group which included expertise in health services  
23 research, social policy, epidemiology and public health and general practice (SMH, MOM,  
24 IP, CB). Discussions led to the reformulation of some of the prompts used during the  
25 interview. A checklist was originally devised to encourage the interviewee to indicate  
26 whether a factor was a barrier or facilitator to care delivery in his/her practice. However,  
27 experience during the interviews and initial analysis suggested that this format was restrictive  
28 and superficial as participants considered certain factors as both barriers and facilitators  
29 depending on their presence or absence in the practice. Hence, the checklist was modified  
30 into a written prompt, around which participants could discuss their views and experiences.

31  
32  
33 | The Framework approach was used for data analysis.<sup>17</sup> This method enabled investigation of  
34 a priori objectives identified in the topic guide while also allowing new themes to emerge  
35 from the data. The systematic analytical process also provided transparency which facilitated  
36 analysis and discussion by multiple researchers.<sup>18</sup> Initially, interview transcripts were  
37 analysed independently by each researcher (SMH and MOM). The transcripts were read  
38 repeatedly (familiarization) and themes and concepts were identified. A thematic index or  
39 conceptual framework was developed from these codes based on the key areas of the topic  
40 guide but also including newly emerging themes. In this study, it was decided not to apply the  
41 index to the data as data were already quite orderly given the semi-structured nature of the  
42 interview schedule.<sup>17</sup> Data were sorted and synthesized by theme, bringing similar concepts  
43 together (thematic charting). Throughout the analysis the language and expressions of the  
44 GPs were maintained as far as possible to avoid losing the meaning and context.

45  
46  
47 Following separate first wave analysis, the researchers examined the convergence and  
48 divergence of their findings. Divergence arose from two conditions; 1) different labels or  
49 codes applied to the same concept or 2) unique concepts emerging from a researcher's  
50 analysis not identified by the other researcher. Overall, a similar 'constellation of themes'  
51 were identified and the difference lay in the labels applied to those themes, i.e. 'packaging' as  
52 described in another study employing multiple analysts.<sup>19</sup> Through discussion it became clear  
53 that divergent codes typically related to the same concept and consensus was reached on the  
54

1  
2  
3  
4  
5  
6  
7 most appropriate label to apply. Occasionally unique codes emerged from one researcher's  
8 analysis, which were discussed with the wider group. Three interviews from each researcher  
9 were subject to inter-coder reliability by an independent party not involved in data collection  
10 but familiar with the design and aims of the study (CB).

11  
12 Memo writing was also used as an analytic tool to identify avenues for analysis and  
13 interpretation to pursue, connections or comparisons between data and to uncover  
14 assumptions of both the participant and the researcher.<sup>20</sup> A summary of our interpretation was  
15 sent to each participant for respondent validity purposes. None of the participants requested  
16 changes to the interpretation of the data.

## 17 RESULTS

18  
19  
20 Participants' in this study represented the diversity of diabetes care arrangements in Ireland.  
21 There was variation in the level of organisation around diabetes care within practices from  
22 'ad-hoc' opportunistic management to structured diabetes care characterised by regular recall  
23 and review, patient registration and nurse coordination. Although most participants were  
24 from computerised practices, the extent to which they utilised electronic records varied.  
25 There were also different experiences of sharing care with hospital specialists. Hence,  
26 barriers and facilitators were rooted in the context of care delivery; a particular support or  
27 resource could be a barrier or facilitator depending on its presence or absence in a  
28 participant's practice.

29  
30 Barriers and facilitators occurred at multiple levels within the health system and had knock-  
31 on effects ~~as illustrated in Figure 1~~. The main barriers to optimal management occurred at the  
32 health system level: lack of remuneration for diabetes management, lack of coordination  
33 between settings and deficient access to services, particularly in the community. Facilitators  
34 included the availability of a Practice Nurse or Diabetes Nurse Specialist, and serendipitous  
35 access to services which participants felt was due to good 'luck' rather than a process of  
36 service planning in the health system. Figure 1 illustrates these barriers and facilitators and  
37 where they occur within the health system. The figure was developed based on analysis of the  
38 transcripts. The connections identified within the diagram are based on the ramification of  
39 various barriers as identified by participants themselves during the interview process.

### 40 Figure 1 Barriers & facilitators to delivering integrated diabetes care

#### 41 Financial Disincentives

42  
43  
44 The lack of targeted remuneration or financial incentives to provide structured diabetes  
45 management in general practice emerged as one of the main barriers. The 'non-existent'  
46 remuneration was a barrier to care delivery across single-physician and group practices, in  
47 both urban and rural areas. Current forms of remuneration left those practices that provided  
48 regular structured diabetes care at 'a financial loss'. Practices are paid an annual capitation  
49 grant to cover the cost of providing free-acute services to patients eligible under the General  
50 Medical Scheme. This funding is not linked to the intensity or quality of care provided which  
51 could act as 'a disincentive' to do more, according to some participants. Despite the flaws of  
52  
53  
54

the current system, there were divided opinions about the most appropriate form of remuneration. Participants expressed concern about performance-based remuneration and the potential to ‘corrupt’ the provision of care and its providers. One participant voiced the concern that ‘once you incentivise it [diabetes management] other things that you can’t incentivise get lost or diminished in the process.’

~~According to participants~~ The lack of remuneration led to barriers at other levels of the system including stunted practice development, imposing a cost barrier on patients without a medical card and creating a sense of apathy and ‘bad feeling’ among GPs (Box 1). Some participants related the lack of remuneration to the underlying differences in the priorities and values of health care professionals and management in the health system. There were frequent references to ‘us’ and ‘them’ in relation to policy makers and health service management. One participant suggested it was ‘typical of this health system that [the] things we value highly we don’t get paid for, so it’s really [down to] your own interest’. Others called for a new contract which recognised general practice as the most efficient and economical place for managing chronic conditions. However, the lack of resources in the community was seen as a barrier to shifting chronic disease management from the acute setting. Participants described how ‘they [policy makers] want us to do everything in the primary care setting which is understandable... as much as possible it would be nice to be supported to be able to do that but it would mean more staff and that inevitably brings in things that would limit staff which would be incentives and remuneration’.

#### **Box 1: Consequences of the lack of remuneration**

##### **Cost implications for patients without a medical card**

“If we’re getting no recognition and no incentive and no remuneration or anything to do this work, I’d be mad in the head to... keep doing it unless I charge the patient and I don’t like doing that but I don’t have any choice” (GP101, rural single-handed practice)

##### **Impeding practice development at an organisational level**

“At the moment care is opportunistic but if there were incentives for me to hold a clinic that would help. We could keep flow charts and I’d get remuneration because there is none and this [work] takes a lot of time, manpower, secretarial time, nurse time, and at the moment there’s no incentive to do that.” (GP5, urban group computerised practice)

##### **Professional apathy**

“There’s no real recognition for it, which is important, because I think that if things do come down on us, things like [administering] the flu vaccine, which is a minor point, we’ll sort of say ‘fine’, but it’ll show apathy and then it’ll be ‘okay, we’ll see our diabetics once a year now’, because we have to end up making money elsewhere.” (GP112, rural group computerised practice)

#### **‘Vocational’ Incentives**

Participants made the distinction between the financial ~~‘disincentives’ and ‘vocational’ incentives for around~~ providing regular structured diabetes care ~~and other ‘vocational’ or personal incentives.~~ ‘Vocational’ incentives related to a sense of personal or professional

1  
2  
3  
4  
5  
6  
7 obligation to improve care delivery, which acted as internal motivation for some participants  
8 (Box 2). Those who referred to vocational incentives as a source of motivation had  
9 established a systematic structured approach to diabetes management, either as part of a local  
10 primary care initiative or independently within their own practice. However, participants  
11 acknowledged that a special interest in diabetes was limited to ‘pockets’ of practices and ‘you  
12 can’t expect all GPs to be desperately keen on it’. Beyond this group, remuneration and  
13 financial incentives would be the main facilitator to providing structured care in the practice  
14 and therefore the biggest barrier to engaging all GPs at present.  
15  
16  
17

## 18 **Box 2. Vocational Incentives**

### 19 **Job Satisfaction**

20 “If we can get the older diabetics some better control, we'd be doing some good...so from a  
21 personal, job satisfaction professional point of view that would be a huge incentive for me”  
22 (GP110, rural group computerised practice)  
23

### 24 **Patient Feedback**

25 “We're starting people on insulin who really need it and they feel so much better. [Patients say]  
26 'my energy's back up'...so it's very rewarding, you get a lot of good feedback from patients”  
27 (GP103, urban group computerised practice)  
28

### 29 **Personal Experience**

30 “My own father was in hospital 7 or 8 years ago. He was on the ward and there were 7 other guys,  
31 it was a vascular ward, and they were all diabetics. Some of them were in for 8, 12 weeks, or 16  
32 weeks...incredible. At the same time I read somewhere that if you can get, is it, a 1% drop in the  
33 HbA1C, reduces the complications by 25%.So that struck a chord with me...” (GP110, rural group  
34 computer practice)  
35

### 36 **Professional Duty**

37 “...the international evidence is such that we felt duty bound to offer as tight control as we can for  
38 patients” (GP103, urban group computerised practice)  
39

### 40 **Personal Values & Priorities**

41 “Depending [on] what your attitude is and your enthusiasm [for] preventative stuff, which to me is  
42 just as important if not more important and it's enjoyable” (GP101, rural single computerised  
43 practice)  
44

45 “We feel that we've improved the service that they've [patients] been given, so that was the  
46 incentive, but that's the only incentive” (GP112, rural, group computerised practice)  
47

## 48 **Lack of Integration between settings and professionals**

49  
50 The relationship between practices and secondary care diabetes teams was largely positive for  
51 most participants who described the hospital-based specialist service as ‘a resource’, ‘an  
52 essential support’ and a ‘door way to services’. A small number of participants reported an  
53 unconstructive relationship with the hospital-based team which was a barrier to delivering  
54 optimal care. These participants felt it would be hard to take part in integrated care ‘with the  
55

1  
2  
3  
4  
5  
6  
7 power struggle between primary care and secondary services'. Part of this struggle related to  
8 attempts on both sides of the primary-secondary interface to 'hold on' to patients.

9  
10 According to participants, the primary barriers to integrated care did not occur at the  
11 professional level but at the level of the health system. The lack of coordination within the  
12 system manifested itself in a number of ways and had ramifications in both settings (Box 3).  
13 In the first instance, participants expressed uncertainty about the boundaries of  
14 responsibility and highlighted the need for 'clear definition as to what the hospital is going to  
15 do, [and] what we're expected to do'. Most participants wanted joint involvement between  
16 consultants and GPs rather than an either/or situation which had negative implications for the  
17 patient and the professional according to one participant: 'if you only deliver care in acute  
18 services then people are left floundering for 6 or 9 months in between...but equally if you  
19 only see them in the community and they don't have a link with the hospital, when they run  
20 into a problem its sometimes very difficult to get somebody in quickly because they're not  
21 part of the system'

22  
23 In addition, the lack of coordination and integrated management led to a sense of ambiguity  
24 around the patients' care pathway. A number of participants referred to an 'in the meantime'  
25 period; this referred to uncertainty about when patients would be called or recalled by  
26 specialist services. For example, one participant from an urban single-handed computerised  
27 practice 'supposed' 'that we're to pick them [patients] up in the meantime', that is between  
28 hospital reviews, but 'there's been no communication, there's been no meetings, there's been  
29 no working group... it's just sort of left like that'. Another participant from an urban group  
30 practice described how patients with diabetes were recalled 'by the system...as the hospital  
31 deems appropriate' with problems referred to the hospital in the meantime, 'that's as much of  
32 a protocol as there is'. This sense of uncertainty around the care pathway also emerged in  
33 relation to accessing support services (illustrated by the quote in Box 3) and was seen as  
34 particularly difficult for patients who were newly diagnosed with diabetes. Furthermore, there  
35 was concern that some patients are 'falling through the net' and not attending either service.

36  
37  
38  
39 ~~The lack of coordination and integrated management was reflected in the process of recalling~~  
40 ~~patients for review. A participant from an urban group practice described how patients with~~  
41 ~~diabetes were recalled 'by the system...as the hospital deems appropriate' with problems~~  
42 ~~referred to the hospital in the meantime, 'that's as much of a protocol as there is'. Similarly,~~  
43 ~~another participant from a rural group practice felt care was not really shared as the hospital~~  
44 ~~brought back the patient until such time as they perceived no problem. The patient 'might'~~  
45 ~~return to the GP but there was no sharing of information in the meantime. The phrase 'in the~~  
46 ~~meantime' was used by several participants to describe the indefinite period of management~~  
47 ~~between hospital reviews which caused frustration for professionals and patients.~~  
48 ~~Furthermore, there was concern that some patients are 'falling through the net' and not~~  
49 ~~attending either service.~~

50  
51 ~~The sub-theme 'in the meantime' care was one of a number which emerged during interviews~~  
52 ~~as symptoms of the lack of co-ordination and organisation within the system (Box 3). Each~~  
53 ~~symptom of poor coordination was a barrier in itself for patients and health care professionals~~  
54

1  
2  
3  
4  
5  
6  
7 ~~trying to navigate the system. Participants called for the development of a shared protocol~~  
8 ~~to reduce avoidable duplication and clarify the roles and responsibilities within each~~  
9 ~~setting and. Those from computerised practices emphasised the need for shared information~~  
10 ~~systems to improve the integration between settings minimize duplication and overcome the~~  
11 ~~current 'palaver' surrounding processes of care, such as routine blood tests, in the system.~~  
12 ~~Participants from non-computerised practices did not view non-computerisation as a barrier~~  
13 ~~to integrated care or optimal diabetes management. A shared protocol would address~~  
14 ~~avoidable duplication and clarify the roles and responsibilities of each setting while a shared~~  
15 ~~information system would minimize duplication and the current 'palaver' surrounding~~  
16 ~~processes of care in the system.~~

17  
18  
19 'It's what works for me. I'm updated in terms of training and meetings and all that  
20 kind of thing...But I would like to see us having a place in anything that would  
21 develop [in terms of the implementation of integrated diabetes care]' (GP115, rural  
22 single-handed non-computerised).

Formatted: Line spacing: Multiple 1.15 li



### Box 3. Symptoms of the Lack of Coordination

#### **Uncertainty of 'In the meantime care' for patients and providers**

"If you could say to [patients] 'look this is your diagnosis, this is what we're going to discuss and over the next 2 weeks you're going to meet A, B, C and then we have a baseline of everything covered from day 1 and you know exactly where you are, you're on a springboard ready to jump. As opposed to... saying 'stand on the spring board for about 2 months and then 2 months later you **might** get called for your eyes and 2 months later you **might** be called for your feet', in which time they may have had a problem with their feet and they're not quite sure how they should have dealt with it..." (Practice Nurse 104, rural group practice)

#### **'Overburdened' hospital clinics & waiting times**

"I notice that they're pushing them [reviews] out further and further, the reviews would have been 6 months some time ago...its gone to 2 years...Consultants just don't have time, they can't see everybody. It's just not possible. They're doing their best. I've no complaints about their service at all." (GP113, urban single-handed practice)

"There's a massive diabetic clinic in the hospital but care is not better. It's difficult to make appointments, get access to services, especially when it's urgent." (GP10, urban single-handed practice)

#### **The lack of boundaries and bureaucratic 'palaver' around processes of care**

"At the moment it's a big palaver if you check cholesterol, get it to the patient to bring into the hospital and it gets lost in the process lots of times and then it seems incredibly wasteful of effort and time and resources." (GP106, urban group practice)

"...patients spend the last precious days of their lives going from out-patients to out-patients, confused as to who to believe, and in the ideal world, the GP service would be coordinating and making sure it doesn't happen too much,...then they get lost in the follow-up, it gets so complicated" (GP108, rural group practice)

#### **'Avoidable Duplication'**

"Unfortunately they still have to be seen in the hospital annually because for things like retinopathy screening and podiatry care, there isn't one single unit where you could refer them...they have to go through the clinic, there's a bit of duplication that could be avoided" (Practice Nurse 104, rural group practice)

### Support Services- 'Not enough of them and too hard to access'

Participants described access to support services such as dietetics, podiatry and retinopathy screening as 'nonexistent' and 'abysmal' in some areas. The lack of services in the community and the resultant reliance on hospitals for the management of 'finer details like eyes and feet' was a barrier to community-based diabetes care. While the hospital was 'a doorway to services' for some, others described the secondary care services as a 'fortress' with lengthy waiting lists. Where services were in place in the community, availability was frequently described as 'patchy' in both urban and rural areas. Access to services such as dietetics and podiatry fell along a scale from good to bad, or bad to worst in some cases. Few

1  
2  
3  
4  
5  
6  
7 participants had access to a complete range of services for their patients. The availability of  
8 services was further jeopardised by the ongoing government policy to freeze recruitment in  
9 the public sector due to the economic recession. As a result maternity leave was not covered  
10 and those who retired were not replaced. One participant from an urban practice described  
11 how 'foot care is not particularly good, it's a bit random...Dieticians were good, we had a  
12 community dietician and then she went on maternity leave and she wasn't replaced so now  
13 again it's a bit patchy'. The most significant impact was on patients who were left 'muddling  
14 through'. One participant described a patient 'who had very poor eyesight due to diabetes and  
15 we couldn't get a community podiatrist to see her...at all. I mean it [the waiting list] was  
16 about 2 years or something they told me...she wasn't a priority'.

### 18 **'Lucky' to have access to specialists and support services**

20 Several participants referred to themselves and their patients as 'lucky' to have access to  
21 services such as dieticians and podiatrists, suggesting that these services evolved by chance  
22 rather than systematic service planning within the health system. Participants acknowledged  
23 the unique position they were in given the aforementioned 'patchy' access to services. Luck  
24 was a key factor in the availability of a comprehensive diabetes service. Several participants  
25 referred to themselves and their patients as 'lucky' to have access to services such as  
26 dieticians and podiatrists, recognising the unique position they were in. Access in some cases  
27 resulted from the resourcefulness of health care professionals in establishing partnerships or  
28 optimising opportunities.

30  
31 'We're very lucky here, in that we've had a very good access to a dietician for the last  
32 few years now. It was just something they tried themselves. They were based in the  
33 city, and they decided to put some outreach clinics out in the county, and they picked  
34 this town for one of their centres.'

35  
36 Participants also referred to luck in relation to the availability of ~~the advantages of having~~ a  
37 dedicate nurse within the practice or access to a diabetes nurse specialist. This facilitated the  
38 delivery of structured care within the practice and coordination between settings and  
39 specialists. Diabetes Nurse Specialists were described as 'worth their weight in gold' and 'the  
40 single best thing to happen to diabetes from the management point of view'. Improvements in  
41 quality of patient care were attributed to enhanced nurse-led services in the practice and  
42 hospital setting.

### 44 **Risk of General Practice becoming saturated Saturation**

45  
46 Time, resources and workload emerged as barriers to providing optimal diabetes care in  
47 general practice. However, participants did not dwell on these 'limiting factors' which were  
48 perceived as almost inevitable. Time 'is always a barrier' but *timing* was given more attention  
49 by participants who emphasized the importance of early intervention and regular review.  
50 Participants warned about the risk of general practice becoming saturated 'saturation' in  
51 general practice as more ~~and more~~ services are moved to the community including other  
52 chronic physical and mental illnesses and the "huge amount of bloods being done" in primary  
53

1  
2  
3  
4  
5  
6  
7 | care. The health system ‘needs to back up their policy of shifting [management] from  
8 secondary care to primary care’ by providing adequate resources.

9  
10 | “We always have been willing to take on more and more stuff that is primary care-  
11 based [and] bring it out of secondary care but we’re saturated now” (GP110, rural  
12 group computerised)

## 13 14 15 16 17 **DISCUSSION**

18 Although desirable, the barriers to integrated care should not be underestimated.<sup>21</sup> The main  
19 barriers identified in this study were system-level deficiencies including the lack of  
20 remuneration for chronic disease management, poor coordination at the primary-secondary  
21 care interface and insufficient services, particularly in the community, which forced GPs to  
22 rely on the hospital as a doorway to other health care professionals. These challenges have a  
23 ripple effect throughout the system at an organisational, social, professional and patient level.  
24 Participants’ accounts of providing ‘in the meantime care’ and the bureaucratic ‘palaver’  
25 surrounding routine processes of care expose the lack of integration within the system  
26 currently, and the negative impact on efficiency, professional relationships, quality of care  
27 and patient experience.

28  
29  
30  
31 The aim of this study was to identify and understand the barriers and facilitators to optimal  
32 diabetes care from the general practice perspective, in advance of the proposed reorganisation  
33 of services in Ireland. The national model of integrated care has yet to be implemented  
34 therefore the results of this study provide an opportunity to anticipate future barriers and plan  
35 solutions which take into account the local context of care provision. Research from the fields  
36 of implementation science and quality improvement has focused on ways to overcome  
37 structural and contextual barriers through tailored incremental change and professional  
38 leadership.<sup>11 22 23</sup> In this study participants proposed shared protocols and linked information  
39 systems as mechanisms to facilitate the provision of integrated care. While the National  
40 Clinical Care Programme for Diabetes has proposed care pathways for different patient  
41 groups, the absence of a single electronic medical record and unique patient identifier  
42 complicates efforts to share information and track patient care. Appropriate investment and  
43 infrastructure is needed to foster and support widespread participation in quality  
44 improvement.

45  
46  
47 The results support the contention that ‘something more than personal financial gain is  
48 driving professional behaviour’ (p5).<sup>24</sup> Vocational incentives were seen as the primary  
49 motivation for engaging in quality improvement in the absence of adequate financial  
50 remuneration. The distinction between types of incentive is congruent with existing theories  
51 of health worker motivation which identifies individual, organisational and cultural  
52 determinants<sup>25</sup>. Organisational determinants of motivation, such as communication processes  
53 and organisational support through adequate resources and efficient service delivery, are in

1  
2  
3  
4  
5  
6  
7 short supply according to the participants in our study. Remuneration was considered  
8 necessary for widespread improvement as intrinsic incentives were limited to 'pockets of  
9 interest'. Policy-makers deciding on the ideal payment structure for chronic disease  
10 management should take into consideration the context<sup>26</sup> and the alignment of values  
11 between the professional and the organisation.<sup>24</sup> Participants commented that current systems  
12 of remuneration reflected discordance between the values of the health service management  
13 and health care professionals in terms of the importance of investing in chronic disease  
14 management and the contribution of primary care.  
15

16 Some of the themes identified, such as the part played by local circumstances and 'luck' in  
17 securing access to community services, are rooted in the context of the Irish health system  
18 and the history of underinvestment in primary care in Ireland. Despite the nuances of this  
19 system, similar barriers and facilitators have been identified in other countries.<sup>6 27-29</sup> While  
20 previous studies classified factors influencing diabetes care at the level of patient, provider  
21 and organisation/system, this study unpacked further layers of health care delivery,  
22 identifying barriers and facilitators relating to the relationships between providers,  
23 professional attitudes and the culture underlying the health system. A meta-synthesis of the  
24 barriers and facilitators to improvement should be conducted, to develop and understand the  
25 full extent of the evidence base.<sup>30</sup> A number of the barriers have implications beyond diabetes  
26 care and correspond to issues facing the wider primary care setting.<sup>31</sup> Consequently there is  
27 ample opportunity to learn from other settings and countries in terms of how to overcome  
28 these barriers.  
29  
30

### 31 Limitations

32  
33 Participation in this study was based on an 'opt in' procedure during a preceding survey of  
34 GPs in Ireland.<sup>10</sup> This could influence the profile of those who volunteered to be interviewed  
35 however this is a consideration for all qualitative studies. Due to the anonymous nature of the  
36 survey it was not possible to link practice and professional demographics to those who  
37 agreed/did not agree to be interviewed. The survey sample was in line with the national  
38 profile of general practice in Ireland in terms of practice size, location and level of  
39 computerisation.<sup>15</sup> Participants' experiences typified the diversity of care arrangements in the  
40 Irish health system and the organisation of diabetes care in practice ranged from ad-hoc  
41 structured management. While practice characteristics guided the sampling strategy,  
42 perceptions of the main barriers were largely consistent across the sub-groups and attitudes  
43 were shaped to a greater extent by the context of care in terms of access to various supports  
44 and services. The merits of involving more than one analyst in a qualitative study have been  
45 debated.<sup>32 33</sup> In addition to the predominance of research teams in health services research,  
46 analysts from different disciplines can bring breadth and depth to the findings.<sup>34 35</sup>  
47 Furthermore, this approach is often considered an implicit form of inter-rater reliability.<sup>19</sup>  
48 Inter-rater reliability was also applied explicitly in our study. The technique is considered  
49 appropriate in the context of semi-structured interviews whereby all participants are asked  
50 broadly the same questions in the same order.<sup>36</sup> Nevertheless, there is a risk of over-  
51 simplifying codes and themes to facilitate independent checking, therefore inter-rater  
52 reliability was used following the first wave of analysis on initial codes to minimise this risk.  
53  
54  
55

1  
2  
3  
4  
5  
6  
7 This study presents the barriers and facilitators to optimal diabetes management from the  
8 general practice perspective. The other health care professionals involved in the delivery of  
9 diabetes care may face unique challenges within their setting or profession. Furthermore,  
10 while participants highlighted barriers within the system for patients such as the out-of-  
11 pocket costs associated GP care in Ireland, further research with patients is warranted to  
12 garner their views on the introduction of integrated diabetes care in Ireland. A similar  
13 qualitative study has been conducted on patients' attitudes to shared care arrangements in  
14 Ireland.<sup>37</sup>  
15

## 16 **Conclusions**

17  
18 The key ingredients of organisation and enthusiasm, highlighted in 1982<sup>1</sup>, are reflected in the  
19 constellation of themes which emerged in this study of the barriers and facilitators to optimal  
20 integrated care. Given the proposals to reform diabetes services through the introduction of  
21 integrated care and the transfer of uncomplicated Type 2 diabetes management to primary  
22 care, there is a need to understand the current challenges to delivery in this setting.  
23 Reorientation of care must be accompanied by the reorganisation of support and resources.  
24 Internal-Vocational incentives are ~~drivers of change~~ motivating factors for 'pockets' of health  
25 care professionals however, this is not sufficient for widespread engagement of GPs in the  
26 delivery of a national model of integrated diabetes care.  
27  
28  
29  
30  
31  
32  
33  
34  
35  
36  
37  
38  
39  
40  
41  
42  
43  
44  
45  
46  
47  
48  
49  
50  
51  
52  
53  
54  
55  
56  
57  
58  
59  
60

## Acknowledgement

We thank the doctors and nurses who participated in this study. This study was conducted on behalf of the National Diabetes Register Project (NDRP) group.

**Competing Interests:** None declared

**Funding:** This study was conducted on behalf of the National Diabetes Register Project (NDRP) group which was funded by the Health Research Board, Ireland. Sheena Mc Hugh was also funded by the Health Research Board (HRB) as a PhD Scholar of the Health Services Research Institute the HRB's Cross-Institution PhD Scholar Programme in Health Services Research.

## References

1. Thorn P, Watkins P. Organisation of Diabetic Care. *British Medical Journal* 1982;285(6344):787-89.
2. Wagner EH, Austin BT, Davis C, Hindmarsh M, Schaefer J, Bonomi A. Improving chronic illness care: translating evidence into action. *Health Affairs* 2001;20(6):64.
3. Bodenheimer T, Wagner EH, Grumbach K. Improving primary care for patients with chronic illness. *JAMA* 2002;288(14):1775-79.
4. Gröne O, Garcia-Barbero M. Integrated care: a position paper of the WHO European office for integrated health care services. *International Journal of Integrated Care* 2001;1.
5. Harkins V. A Practical Guide to Integrated Type 2 Diabetes Care. In: Irish College of General Practitioners, Health Service Executive, Irish Endocrine Society, editors. Dublin: Health Service Executive, 2008.
6. Johnson M, Goyder E. Changing roles, changing responsibilities and changing relationships: an exploration of the impact of a new model for delivering integrated diabetes care in general practice. *Quality in Primary Care* 2005;13(2):85-90.
7. Department of Health. Health in Ireland. Key Trends 2012. Dublin: Government of Ireland, 2012.
8. Brennan C, Harkins V, Perry I. Management of diabetes in primary care: A structured-care approach. *European Journal of General Practice* 2008;14(3):117-22.
9. Mc Hugh S, Marsden P, Brennan C, Murphy K, Croarkin C, Moran J, et al. Counting on commitment; the quality of primary care-led diabetes management in a system with minimal incentives. *BMC Health Serv Res* 2011;11(1):384-93.
10. Mc Hugh S, O'Keefe J, Fitzpatrick A, de Siún A, O'Mullane M, Perry I, et al. Diabetes care in Ireland: A survey of general practitioners. *Primary Care Diabetes* 2009;3(4):225-31.
11. Vize R. Integrated care: a story of hard won success. *Bmj* 2012;344.
12. Rudkjøbing A, Olejaz M, Birk HO, Nielsen AJ, Hernández-Quevedo C, Krasnik A. Integrated care: a Danish perspective. *Bmj* 2012;345.
13. Berwick D, Enthoven A, Bunker J. Quality management in the NHS: the doctor's role--II. *BMJ: British Medical Journal* 1992;304(6822):304.
14. Scott T, Mannion R, Davies HTO, Marshall MN. Implementing culture change in health care: theory and practice. *Int J Qual Health Care* 2003;15(2):111-18.
15. O'Dowd T, O'Kelly M, O'Kelly F, Trinity College . Dept. of Public Health & Primary Care. *Structure of general practice in Ireland: 1982-2005*. Dublin: Department of Public Health and Primary Care, Trinity College Centre for Health Sciences [and] Irish College of General Practitioners, 2006.
16. Pope C, Ziebald S, Mays N. Analysing qualitative data. In: Pope C, Mays N, editors. *Qualitative research in health care*. 3rd ed. London: Blackwell Publishing, 2006.

17. Ritchie J, Lewis J. *Qualitative Research Practice: A Guide for Social Science Students & Researchers*. Thousand Oaks: Sage Publications, 2003.
18. Pope C, van Royen P, Baker R. Qualitative methods in research on healthcare quality. *Quality and Safety in Health Care* 2002;11(2):148-52.
19. Armstrong D, Gosling A, Weinman J, Marteau T. The place of inter-rater reliability in qualitative research: an empirical study. *Sociology* 1997;31(3):597.
20. Charmaz K. *Constructing Grounded Theory: A practical guide through qualitative analysis*. London: Sage Publications Ltd, 2006.
21. Godlee F. Integrated care is what we all want. *Bmj* 2012;344.
22. Berwick DM. Disseminating innovations in health care. *JAMA* 2003;289(15):1969-75.
23. Lemmens K, Nieboer A, Rutten-Van Mólken M, van Schayck C, Spreuwenberg C, Asin J, et al. Bottom-up implementation of disease-management programmes: results of a multisite comparison. *BMJ Quality & Safety* 2011;20(1):76-86.
24. Marshall M, Harrison S. It's about more than money: financial incentives and internal motivation. *Quality and Safety in Health Care* 2005;14(1):4.
25. Franco LM, Bennett S, Kanfer R. Health sector reform and public sector health worker motivation: a conceptual framework. *Social Science & Medicine* 2002;54(8):1255-66.
26. Gosden T, Forland F, Kristiansen I, Sutton M, Leese B, Giuffrida A, et al. Capitation, salary, fee-for-service and mixed systems of payment: effects on the behaviour of primary care physicians. *Cochrane Database Syst Rev* 2000;3(3).
27. Agarwal G, Pierce M, Ridout D. The GP perspective: problems experienced in providing diabetes care in UK general practice. *Diabetic Medicine* 2002;19(s4):13-20.
28. Brown JB, Harris SB, Webster-Bogaert S, Wetmore S, Faulds C, Stewart M. The role of patient, physician and systemic factors in the management of type 2 diabetes mellitus. *Family Practice* 2002;19(4):344-49.
29. Khunti K, Ganguli S, Baker R, Lowy A. Features of primary care associated with variations in process and outcome of care of people with diabetes. *Br J Gen Pract* 2001;51(466):356-60.
30. Dixon-Woods M, Booth A, Sutton AJ. Synthesizing qualitative research: a review of published reports. *Qualitative Research* 2007;7(3):375-422.
31. Oelke ND, Thurston WE, Dipalma R, Tink W, Mazonde JN, Mak A, et al. Understanding issues in primary care: perspectives of primary care physicians. *Quality in Primary Care: Radcliffe Publishing*, 2006:253-58.
32. Malterud K. Qualitative research: standards, challenges, and guidelines. *The Lancet* 2001;358(9280):483-88.
33. Bradley E, Curry L, Devers K. Qualitative Data Analysis for Health Services Research: Developing Taxonomy, Themes, and Theory. *Health Services Research* 2007;42(4):1758.
34. Pope C, Mays N. Qualitative research: reaching the parts other methods cannot reach: an introduction to qualitative methods in health and health services research. 1995;311(6996):42-45.
35. Pope C, Ziebland S, Mays N. Qualitative research in health care: analysing qualitative data. *British Medical Journal* 2000;320(7227):114.
36. Morse J. " Perfectly Healthy, but Dead": The Myth of Inter-Rater Reliability. *Qualitative Health Research* 1997;7(4):445.
37. Smith SM, O'Leary M, Bury G, Shannon W, Tynan A, Staines A, et al. A qualitative investigation of the views and health beliefs of patients with Type 2 diabetes following the introduction of a diabetes shared care service. *Diabetic Medicine* 2003;20(10):853-57.

#### Legend Figure 1:

Barrier 

Facilitator
